# Supplementary material for: Synthesis of tetrahydrofuro[3,2-c]pyridines via Pictet–Spengler reaction
Source: publisher site journal article supplement (doi:10.3762/bjoc.19.74), 2023-06-30
Supplement: Additional file 1 [file 1860-5397-19-74-S1.pdf]

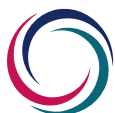

## Supporting Information

for

### Synthesis of tetrahydrofuro[3,2-c]pyridines via Pictet–Spengler reaction

Elena Y. Mendogralo and Maxim G. Uchuskin

*Beilstein J. Org. Chem.* **2023**, *19*, 991–997. [doi:10.3762/bjoc.19.74](https://doi.org/10.3762/bjoc.19.74)

**Experimental procedures, characterization data, copies of  $^1\text{H}$  and  $^{13}\text{C}$  NMR spectra, HRMS of new compounds, and X-ray crystallography data**

## Table of contents

|                                                                                                                                             |     |
|---------------------------------------------------------------------------------------------------------------------------------------------|-----|
| 1. General information .....                                                                                                                | S2  |
| 2. General procedure for the synthesis of tetrahydrofuro[3,2- <i>c</i> ]pyridines <b>4</b> .....                                            | S2  |
| 3. Synthesis of 3-(2-oxopropyl)-2-phenylpiperidin-4-one ( <b>5a</b> ) .....                                                                 | S8  |
| 4. Synthesis of 1-(4-chlorophenyl)-2-methyl-4-phenyl-4,5,6,7-tetrahydro-1 <i>H</i> -<br>pyrrolo[3,2- <i>c</i> ]pyridine ( <b>6a</b> ) ..... | S8  |
| 5. Synthesis of 2,5-dimethyl-4-phenyl-4,5,6,7-tetrahydrofuro[3,2- <i>c</i> ]pyridine ( <b>4r</b> ) .....                                    | S9  |
| 6. Synthesis of 1-(2-methyl-4-phenyl-6,7-dihydrofuro[3,2- <i>c</i> ]pyridin-<br>5(4 <i>H</i> )-yl)ethan-1-one ( <b>4q</b> ) .....           | S10 |
| 7. Copies of <sup>1</sup> H, <sup>13</sup> C NMR spectra of new compounds .....                                                             | S11 |
| 8. X-ray crystallography data .....                                                                                                         | S28 |
| 9. References .....                                                                                                                         | S30 |

## 1. General information

$^1\text{H}$  and  $^{13}\text{C}$  NMR spectra were recorded on a Bruker Avance III HD 400 (400 MHz for  $^1\text{H}$  and 100 MHz for  $^{13}\text{C}$  NMR) at 40 °C. The chemical shifts ( $\delta$ ) were measured in ppm with respect to the solvent ( $[\text{D}_6]$  DMSO,  $^1\text{H}$ :  $\delta = 2.50$  ppm,  $^{13}\text{C}$ :  $\delta = 39.52$  ppm). Coupling constants ( $J$ ) are given in hertz (Hz). The peak patterns are indicated as follows: s (singlet), d (doublet), t (triplet), q (quartet), m (multiplet), dd (doublet of doublets) and br (broadened). High-resolution mass measurements (HRMS) were carried out using a Bruker microTOF-QTM ESI-TOF mass spectrometer. GC/MS analysis was performed on an Agilent 7890B interfaced to an Agilent 5977A mass selective detector. Melting points were determined with a Stuart SMP 30. Data sets for X-ray diffraction were collected with a New Xcalibur, Ruby diffractometer. Column chromatography was performed on silica gel Macherey Nagel (40–63  $\mu\text{m}$ ). Flash column chromatography was performed over silica gel (0.04–0.063 mm) using a mixture of ethyl acetate and petroleum ether. TLC plates were visualized by exposure to ultraviolet light. Starting 2-(5-methylfuran-2-yl)ethanamine was synthesized according to known procedure [1]. All the reactions were carried out using freshly distilled and dry solvents from solvent stills.

## 2. General procedure for the synthesis of tetrahydrofuro[3,2-c]pyridines 4.

**Method A:** To a solution of aldehyde **2** (1.0 mmol) in dry acetonitrile (1 mL) 2-(5-methylfuran-2-yl)ethanamine (**1a**, 1.0 mmol, 125  $\mu\text{L}$ ) was added. The reaction mixture was heated at 82 °C for 1 h (TLC control) and concentrated to dryness. To the solution of crude imine in glacial AcOH (750  $\mu\text{L}$ ) was added portionwise conc. HCl (500  $\mu\text{L}$ ). The reaction mixture was stirred at 70 °C for 5 h (TLC control). Then an aq. saturated solution of NaOH was added and the mixture was stirred overnight at room temperature. The formed precipitate was filtered and the filtrate was extracted with

ethyl acetate (3 × 10 mL). The combined organic layers were washed with brine (3 × 10 mL), dried with anhydrous Na<sub>2</sub>SO<sub>4</sub> and concentrated to dryness. The residue and precipitate were combined. The product was purified by column chromatography on silica gel using a mixture of petroleum ether/ethyl acetate 1:1 as an eluent and recrystallized from a suitable solvent.

**Method B:** To a solution of aldehyde **2** (2.0 mmol) in dry acetonitrile (2 mL) 2-(5-methylfuran-2-yl)ethanamine (**1a**, 2.0 mmol, 250 μL) was added. The reaction mixture was heated at 82 °C for 1 h (TLC control) and concentrated to dryness. To the solution of the crude imine in glacial AcOH (1.5 mL) was added portionwise conc. HCl (1 mL). The reaction mixture was stirred at 70 °C for 5 h (TLC control). Then aq. saturated solution of NaOH was added and the mixture was stirred overnight at room temperature. The formed precipitate was filtered and the filtrate was extracted with ethyl acetate (3 × 20 mL). The combined organic layers were washed with brine (3 × 20 mL), dried with anhydrous Na<sub>2</sub>SO<sub>4</sub> and concentrated to dryness. The residue and precipitate were combined. The product was purified by column chromatography on silica gel using a mixture of petroleum ether/ethyl acetate 1:1 as an eluent and recrystallized from a suitable solvent.

*2-Methyl-4-phenyl-4,5,6,7-tetrahydrofuro[3,2-c]pyridine (4a)* [2]. Yield: 143 mg, 67% (method A); pale beige solid; mp = 107–108 °C (petroleum ether/acetone); <sup>1</sup>H NMR (400 MHz, DMSO-*d*<sub>6</sub>): δ 7.31 – 7.22 (m, 5H), 5.60 (br. s, 1H), 4.75 (br. t, *J* = 1.9 Hz, 1H), 3.13 – 3.07 (m, 1H), 2.95 – 2.88 (m, 1H), 2.67 – 2.60 (m, 1H), 2.52 – 2.48 (m, 1H), 2.19 (s, 3H) ppm; <sup>13</sup>C{<sup>1</sup>H} NMR (100 MHz, DMSO-*d*<sub>6</sub>): δ 149.0, 147.5, 143.7, 127.9 (2C), 127.7 (2C), 126.7, 120.2, 104.9, 56.2, 41.5, 24.1, 13.1 ppm; HRMS (ESI<sup>+</sup>) *m/z*: [M+H]<sup>+</sup> Calcd for C<sub>14</sub>H<sub>16</sub>NO<sup>+</sup> 214.1226; found 214.1225.

*3-(2-Oxopropyl)-2-phenylpiperidin-4-one (5a)*. Product **5a** was obtained by method A, along with the major product **4a**. Yield: 23 mg, 10% (dr > 19:1 determined by NMR); pale beige oil; <sup>1</sup>H NMR (400 MHz, DMSO-*d*<sub>6</sub>): δ 7.40 – 7.34 (m, 5H), 3.57 (s, 1H), 3.54 (s, 1H), 3.34 – 3.29 (m, 1H), 3.05 – 2.99 (m, 1H), 2.84 – 2.78 (m, 1H), 2.70 – 2.58 (m, 3H), 2.27 – 2.23 (m, 1H), 1.94 (s, 3H) ppm; <sup>13</sup>C{<sup>1</sup>H} NMR (100 MHz, DMSO-*d*<sub>6</sub>): δ 208.5, 206.3, 141.9, 129.2, 128.4 (2C), 127.6 (2C), 66.5, 53.9, 46.2, 42.5, 38.9, 30.0 ppm; HRMS (ESI<sup>+</sup>) m/z: [M+H]<sup>+</sup> Calcd for C<sub>14</sub>H<sub>18</sub>NO<sub>2</sub><sup>+</sup> 232.1332; found 232.1330.

*2-Methyl-4-phenyl-4,5,6,7-tetrahydrofuro[3,2-*c*]pyridine hydrochloride (4a')*. Product **4a'** was obtained by method A, along with the major product **4a**. Yield: 20 mg, 8%; yellow oil; <sup>1</sup>H NMR (400 MHz, DMSO-*d*<sub>6</sub>): δ 7.32 – 7.25 (m, 5H), 5.61 (br. s, 1H), 4.77 (br. s, 1H), 4.08 (br. s, 2H), 3.13 – 3.09 (m, 1H), 2.96 – 2.91 (m, 1H), 2.68 – 2.61 (m, 1H), 2.54 – 2.50 (m, 1H), 2.19 (s, 3H) ppm; <sup>13</sup>C{<sup>1</sup>H} NMR (100 MHz, DMSO-*d*<sub>6</sub>): δ 149.0, 147.5, 143.5, 127.9 (2C), 127.7 (2C), 126.8, 120.1, 104.9, 56.2, 41.5, 24.0, 13.1 ppm.

*4-(4-Chlorophenyl)-2-methyl-4,5,6,7-tetrahydrofuro[3,2-*c*]pyridine (4b)*. Yield: 124 mg, 50% (method A); yellow solid; mp = 73–75 °C (petroleum ether/ethyl acetate); <sup>1</sup>H NMR (400 MHz, DMSO-*d*<sub>6</sub>): δ 7.37 – 7.31 (m, 4H), 5.62 (br. s, 1H), 4.75 (br. s, 1H), 3.09 – 3.04 (m, 1H), 2.94 – 2.88 (m, 1H), 2.65 – 2.58 (m, 2H), 2.52 – 2.48 (m, 1H), 2.19 (s, 3H) ppm; <sup>13</sup>C{<sup>1</sup>H} NMR (100 MHz, DMSO-*d*<sub>6</sub>): δ 149.1, 147.6, 142.8, 131.3, 129.5 (2C), 127.8 (2C), 119.8, 104.7, 55.4, 41.3, 24.0, 13.1 ppm; HRMS (ESI<sup>+</sup>) m/z: [M+H]<sup>+</sup> Calcd for C<sub>14</sub>H<sub>15</sub>ClNO<sup>+</sup> 248.0837; found 248.0846.

*4-(4-Bromophenyl)-2-methyl-4,5,6,7-tetrahydrofuro[3,2-*c*]pyridine (4c)*. Yield: 120 mg, 41% (method A); yellow oil; <sup>1</sup>H NMR (400 MHz, DMSO-*d*<sub>6</sub>): δ 7.49 (d, *J* = 8.3 Hz, 2H),

7.27 (d,  $J = 8.3$  Hz, 2H), 5.62 (br. s, 1H), 4.74 (br. s, 1H), 3.09 – 3.04 (m, 1H), 2.94 – 2.88 (m, 1H), 2.65 – 2.58 (m, 1H), 2.51 – 2.48 (m, 1H), 2.18 (s, 3H) ppm;  $^{13}\text{C}\{^1\text{H}\}$  NMR (100 MHz, DMSO- $d_6$ ):  $\delta$  149.2, 147.6, 143.2, 130.8 (2C), 130.0 (2C), 119.8, 119.7, 104.7, 55.4, 41.3, 24.0, 13.1 ppm; HRMS (ESI $^+$ )  $m/z$ :  $[\text{M}+\text{H}]^+$  Calcd for  $\text{C}_{14}\text{H}_{15}\text{BrNO}^+$  292.0332; found 292.0326.

*2-Methyl-4-[4-(trifluoromethyl)phenyl]-4,5,6,7-tetrahydrofuro[3,2-*c*]pyridine (4d)*. Yield: 112 mg, 20% (method B); pale beige solid; mp = 87 °C (petroleum ether/ethyl acetate);  $^1\text{H}$  NMR (400 MHz, DMSO- $d_6$ ):  $\delta$  7.67 (d,  $J = 8.2$  Hz, 2H), 7.54 (d,  $J = 8.2$  Hz, 2H), 5.65 (br. s, 1H), 4.85 (br. s, 1H), 3.10 – 3.05 (m, 1H), 2.97 – 2.91 (m, 1H), 2.75 (br. s, 1H), 2.67 – 2.60 (m, 1H), 2.55 – 2.53 (m, 1H), 2.19 (s, 3H) ppm;  $^{13}\text{C}\{^1\text{H}\}$  NMR (100 MHz, DMSO- $d_6$ ):  $\delta$  149.3, 148.6 (br. s), 147.7, 128.5 (2C), 127.5 (q,  $^2J_{\text{CF}} = 31$  Hz), 124.8 (q,  $^3J_{\text{CF}} = 3.8$  Hz, 2C), 124.3 (q,  $^1J_{\text{CF}} = 270$  Hz), 119.5, 104.7, 55.6, 41.3, 24.0, 13.1 ppm; HRMS (ESI $^+$ )  $m/z$ :  $[\text{M}+\text{H}]^+$  Calcd for  $\text{C}_{15}\text{H}_{15}\text{F}_3\text{NO}^+$  282.1100; found 282.1095.

*2-Methyl-4-(4-methylphenyl)-4,5,6,7-tetrahydrofuro[3,2-*c*]pyridine (4e)*. Yield: 129 mg, 57% (method A); yellow oil;  $^1\text{H}$  NMR (400 MHz, DMSO- $d_6$ ):  $\delta$  7.17 (d,  $J = 8.0$  Hz, 2H), 7.10 (d,  $J = 8.0$  Hz, 2H), 5.57 (s, 1H), 4.69 (br. s, 1H), 3.11 – 3.06 (m, 1H), 2.92 – 2.86 (m, 1H), 2.65 – 2.58 (m, 1H), 2.50 – 2.46 (m, 1H), 2.28 (s, 3H), 2.17 (s, 3H) ppm;  $^{13}\text{C}\{^1\text{H}\}$  NMR (100 MHz, DMSO- $d_6$ ):  $\delta$  148.9, 147.5, 140.7, 135.8, 128.4 (2C), 127.6 (2C), 120.4, 104.9, 56.0, 41.5, 24.1, 20.5, 13.1 ppm; HRMS (ESI $^+$ )  $m/z$ :  $[\text{M}+\text{H}]^+$  Calcd for  $\text{C}_{15}\text{H}_{18}\text{NO}^+$  228.1383; found 228.1386.

*4-(4-Methoxyphenyl)-2-methyl-4,5,6,7-tetrahydrofuro[3,2-*c*]pyridine (4f)*. Yield: 350 mg, 72% (method B); yellow oil;  $^1\text{H}$  NMR (400 MHz, DMSO- $d_6$ ):  $\delta$  7.19 (d,  $J = 8.6$  Hz,

2H), 6.85 (d,  $J = 8.6$  Hz, 2H), 5.57 (s, 1H), 4.68 (s, 1H), 3.73 (s, 3H), 3.10 – 3.05 (m, 1H), 2.91 – 2.85 (m, 1H), 2.64 – 2.57 (m, 1H), 2.50 – 2.46 (m, 1H), 2.18 (s, 3H) ppm;  $^{13}\text{C}\{^1\text{H}\}$  NMR (100 MHz,  $\text{DMSO-}d_6$ ):  $\delta$  158.2, 148.9, 147.5, 135.8, 128.8 (2C), 120.5, 113.3 (2C), 104.9, 55.6, 54.9, 41.5, 24.1, 13.1 ppm; HRMS (ESI<sup>+</sup>)  $m/z$ :  $[\text{M}+\text{H}]^+$  Calcd for  $\text{C}_{15}\text{H}_{18}\text{NO}_2^+$  244.1332; found 244.1328.

*N,N*-Dimethyl-4-(2-methyl-4,5,6,7-tetrahydrofuro[3,2-*c*]pyridin-4-yl)aniline (**4g**). Yield: 297 mg, 58% (method B); pale beige solid; mp = 74–76 °C (petroleum ether/ethyl acetate);  $^1\text{H}$  NMR (400 MHz,  $\text{DMSO-}d_6$ ):  $\delta$  7.08 (d,  $J = 8.8$  Hz, 2H), 6.66 (d,  $J = 8.8$  Hz, 2H), 5.56 (s, 1H), 4.62 (br. s, 1H), 3.11 – 3.05 (m, 1H), 2.90 – 2.87 (m, 1H), 2.86 (s, 6H), 2.64 – 2.57 (m, 1H), 2.46 – 2.44 (m, 1H), 2.18 (s, 3H) ppm;  $^{13}\text{C}\{^1\text{H}\}$  NMR (100 MHz,  $\text{DMSO-}d_6$ ):  $\delta$  150.2, 149.3, 148.0, 131.9, 128.9 (2C), 121.3, 112.6 (2C), 105.6, 56.3, 42.1, 40.8 (2C), 24.7, 13.7 ppm; HRMS (ESI<sup>+</sup>)  $m/z$ :  $[\text{M}+\text{H}]^+$  Calcd for  $\text{C}_{16}\text{H}_{21}\text{N}_2\text{O}^+$  257.1648; found 257.1651.

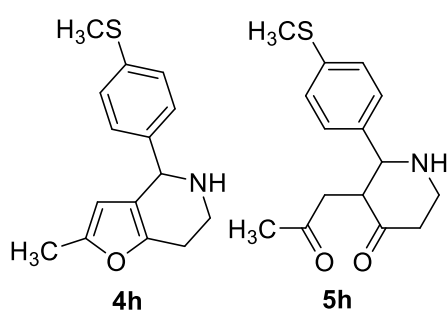

Mixture of 2-methyl-4-[4-(methylthio)phenyl]-4,5,6,7-tetrahydrofuro[3,2-*c*]pyridine (**4h**) and 2-[4-(methylthio)phenyl]-3-(2-oxopropyl)piperidin-4-one (**5h**). **4h** yield: 55 mg, 11% (method B); **5h** yield: 108 mg, 20% (method B); pale beige oil; **5h:4h** = **2:1**. For

**5h**  $^1\text{H}$  NMR (400 MHz,  $\text{DMSO-}d_6$ ):  $\delta$  7.33 – 7.31 (m, 2H), 7.24 – 7.19 (m, 2H), 3.53 (d,  $J = 10.6$  Hz, 1H), 3.33 – 3.29 (m, 2H), 3.01 – 2.96 (m, 1H), 2.83 – 2.77 (m, 1H), 2.68 – 2.57 (m, 1H), 2.46 (s, 3H), 2.26 – 2.23 (m, 1H), 1.96 (s, 3H) ppm;  $^{13}\text{C}\{^1\text{H}\}$  NMR (100 MHz,  $\text{DMSO-}d_6$ ):  $\delta$  208.4, 206.1, 140.5, 137.1, 128.0 (2C), 125.9 (2C), 65.9, 53.8, 46.1, 42.4, 38.9, 29.9, 14.7 ppm; HRMS (ESI<sup>+</sup>)  $m/z$ :  $[\text{M}+\text{H}]^+$  Calcd for  $\text{C}_{15}\text{H}_{20}\text{NO}_2\text{S}^+$  278.1209; found 278.1187. For **4h**  $^1\text{H}$  NMR (400 MHz,  $\text{DMSO-}d_6$ ):  $\delta$  7.24 – 7.19 (m,

4H), 5.60 (s, 1H), 4.71 (br. s, 1H), 3.10 – 3.05 (m, 1H), 2.93 – 2.87 (m, 1H), 2.68 – 2.57 (m, 2H), 2.45 (s, 3H), 2.18 (s, 3H) ppm;  $^{13}\text{C}\{^1\text{H}\}$  NMR (100 MHz, DMSO- $d_6$ ):  $\delta$  149.0, 147.5, 138.6, 136.2, 128.3 (2C), 125.9 (2C), 120.0, 104.8, 55.7, 41.4, 24.0, 14.9, 13.1 ppm; HRMS (ESI<sup>+</sup>) m/z: [M+H]<sup>+</sup> Calcd for C<sub>15</sub>H<sub>18</sub>NOS<sup>+</sup> 260.1104; found 260.1107.

*2-Methyl-4-(2-methylphenyl)-4,5,6,7-tetrahydrofuro[3,2-c]pyridine (4i)*. Yield: 263 mg, 58% (method A); yellow oil;  $^1\text{H}$  NMR (400 MHz, DMSO- $d_6$ ):  $\delta$  7.17 – 7.08 (m, 4H), 5.54 (s, 1H), 4.96 (t,  $J$  = 2.0 Hz, 1H), 3.11 – 3.05 (m, 1H), 2.93 – 2.87 (m, 1H), 2.67 – 2.60 (m, 1H), 2.53 – 2.49 (m, 1H), 2.40 (s, 3H), 2.19 (s, 3H) ppm;  $^{13}\text{C}\{^1\text{H}\}$  NMR (100 MHz, DMSO- $d_6$ ):  $\delta$  149.0, 147.9, 141.2, 136.0, 130.1, 127.7, 126.6, 125.2, 119.9, 104.8, 53.1, 41.5, 24.2, 18.7, 13.1 ppm; HRMS (ESI<sup>+</sup>) m/z: [M+H]<sup>+</sup> Calcd for C<sub>15</sub>H<sub>18</sub>NO<sup>+</sup> 228.1383; found 228.1384.

*4-(3,4-Dimethoxyphenyl)-2-methyl-4,5,6,7-tetrahydrofuro[3,2-c]pyridine (4j)*. Yield: 172 mg, 63% (method A); pale beige solid; mp = 108–109 °C (petroleum ether/ethyl acetate);  $^1\text{H}$  NMR (400 MHz, DMSO- $d_6$ ):  $\delta$  6.91 (d,  $J$  = 1.9 Hz, 1H), 6.87 (d,  $J$  = 8.2 Hz, 1H), 6.78 (dd,  $J$  = 8.2, 1.9 Hz, 1H), 5.61 (s, 1H), 4.70 (br. s, 1H), 3.73 (s, 3H), 3.72 (s, 3H), 3.14 – 3.08 (m, 1H), 2.93 – 2.87 (m, 1H), 2.66 – 2.59 (m, 1H), 2.47 – 2.46 (m, 1H), 2.18 (s, 3H) ppm;  $^{13}\text{C}\{^1\text{H}\}$  NMR (100 MHz, DMSO- $d_6$ ):  $\delta$  148.9, 148.5, 147.9, 147.3, 136.0, 120.3, 119.7, 111.9, 111.5, 104.9, 55.9, 55.5, 55.4, 41.5, 24.0, 13.1 ppm; HRMS (ESI<sup>+</sup>) m/z: [M+H]<sup>+</sup> Calcd for C<sub>16</sub>H<sub>20</sub>NO<sub>3</sub><sup>+</sup> 274.1438; found 274.1445.

*2-Methyl-4-(3-phenoxyphenyl)-4,5,6,7-tetrahydrofuro[3,2-c]pyridine (4k)*. Yield: 143 mg, 47% (method A); yellow oil;  $^1\text{H}$  NMR (400 MHz, DMSO- $d_6$ ):  $\delta$  7.40 – 7.30 (m, 4H), 7.15 – 7.10 (m, 2H), 7.00 – 6.98 (m, 2H), 6.88 (dd,  $J$  = 8.0, 1.9 Hz, 1H), 5.65 (s, 1H), 4.75 (br. s, 1H), 3.10 – 3.05 (m, 1H), 2.94 – 2.88 (m, 1H), 2.64 – 2.57 (m, 1H), 2.51 –



2.47 (m, 1H), 2.18 (s, 3H) ppm;  $^{13}\text{C}\{^1\text{H}\}$  NMR (100 MHz, DMSO- $d_6$ ):  $\delta$  156.6, 156.3, 149.1, 147.5, 146.0, 129.8 (2C), 129.4, 123.2, 122.9, 119.8, 118.3 (2C), 118.0, 117.0, 104.8, 55.8, 41.4, 24.0, 13.1 ppm; HRMS (ESI $^+$ ) m/z:  $[\text{M}+\text{H}]^+$  Calcd for  $\text{C}_{20}\text{H}_{20}\text{NO}_2^+$  306.1489; found 306.1486.

*2-Methyl-4-(thiophen-2-yl)-4,5,6,7-tetrahydrofuro[3,2-c]pyridine (4I)*. Yield: 66 mg, 15% (method B); yellow oil;  $^1\text{H}$  NMR (400 MHz, DMSO- $d_6$ ):  $\delta$  7.39 (dd,  $J = 4.7, 1.0$  Hz, 1H), 7.00 – 6.98 (m, 2H), 5.87 (s, 1H), 5.08 (br. s, 1H), 3.12 – 3.06 (m, 1H), 3.02 – 2.96 (m, 1H), 2.59 – 2.55 (m, 2H), 2.25 (s, 3H) ppm;  $^{13}\text{C}\{^1\text{H}\}$  NMR (100 MHz, DMSO- $d_6$ ):  $\delta$  149.0, 148.7, 147.3, 126.2, 124.3, 124.2, 120.1, 104.9, 51.3, 40.6, 23.9, 13.1 ppm; HRMS (ESI $^+$ ) m/z:  $[\text{M}+\text{H}]^+$  Calcd for  $\text{C}_{12}\text{H}_{14}\text{NOS}^+$  220.0791; found 220.0786.

**3. Synthesis of 3-(2-oxopropyl)-2-phenylpiperidin-4-one (5a).** To a solution of 2-methyl-4-phenyl-4,5,6,7-tetrahydrofuro[3,2-c]pyridine (**4a**, 0.8 mmol, 176 mg) in 1,4-dioxane (2 mL) was added portionwise 30% HCl (2.5 mL). The reaction mixture was refluxed for 9 h (TLC control). The yield of **5a** (70%) was determined by GC/MS using an internal standard.

**4. Synthesis of 1-(4-chlorophenyl)-2-methyl-4-phenyl-4,5,6,7-tetrahydro-1H-pyrrolo[3,2-c]pyridine (6a).** To a solution of 2-methyl-4-phenyl-4,5,6,7-tetrahydrofuro[3,2-c]pyridine (**4a**, 0.8 mmol, 176 mg) in 1,4-dioxane (2 mL) was added portionwise 30% HCl (2.5 mL). The reaction mixture was refluxed for 9 h (TLC control). Then 4-chloroaniline (0.8 mmol, 105 mg) and 30% HCl (1.8 mL) were added. The reaction mixture was refluxed for 4 h (TLC control). Then aq. saturated solution of  $\text{NaHCO}_3$  was added and the mixture was stirred overnight at room temperature. The formed precipitate was filtered and the filtrate was extracted with ethyl acetate (3 x

10 mL). The combined organic layers were washed with brine (3 × 10 mL), dried with anhydrous Na<sub>2</sub>SO<sub>4</sub> and concentrated to dryness. The residue and precipitate were combined. The product was purified by column chromatography on silica gel using a mixture of petroleum ether/ethyl acetate 3:1 as an eluent. Yield: 51 mg, 19%; yellow oil; <sup>1</sup>H NMR (400 MHz, DMSO-*d*<sub>6</sub>): δ 7.55 (d, *J* = 7.6 Hz, 2H), 7.38 (d, *J* = 7.6 Hz, 2H), 7.34 – 7.29 (m, 4H), 7.24 – 7.21 (m, 1H), 5.44 (s, 1H), 4.83 (s, 1H), 3.09 – 3.06 (m, 1H), 2.95 (s, 1H), 2.90 – 2.83 (m, 1H), 2.79 (s, 1H), 2.23 – 2.18 (m, 1H), 1.98 (s, 3H) ppm; <sup>13</sup>C{<sup>1</sup>H} NMR (100 MHz, DMSO-*d*<sub>6</sub>): δ 145.0, 136.7, 131.6, 129.1 (2C), 128.9 (2C), 127.8 (2C), 127.7 (2C), 126.6, 126.5, 126.1, 119.6, 105.2, 57.3, 42.1, 23.6, 12.3 ppm; HRMS (ESI<sup>+</sup>) *m/z*: [M+H]<sup>+</sup> Calcd for C<sub>20</sub>H<sub>20</sub>ClN<sub>2</sub><sup>+</sup> 323.1310; found 323.1312.

**5. Synthesis of 2,5-dimethyl-4-phenyl-4,5,6,7-tetrahydrofuro[3,2-*c*]pyridine (4r).** In a manner similar as described earlier [3]. To a stirred solution of 2-methyl-4-phenyl-4,5,6,7-tetrahydrofuro[3,2-*c*]pyridine (**4a**, 0.7 mmol, 145 mg) in dry THF (2 mL) sodium hydride (3.6 mmol, 60% dispersion in mineral oil, 87 mg) was added portionwise. The reaction mixture was stirred at room temperature for 5 min followed by the addition of methyl iodide (1.2 mmol, 76 μL). The reaction mixture was stirred for 3 h at ambient temperature (TLC control) and then poured into H<sub>2</sub>O (50 mL). The product was extracted with ethyl acetate (3 × 30 mL). The combined organic layers were washed with brine (3 × 20 mL), dried with anhydrous Na<sub>2</sub>SO<sub>4</sub> and concentrated to dryness under reduced pressure. The product was purified by column chromatography on silica gel using a mixture of petroleum ether/ethyl acetate 3:1 as an eluent. Yield: 69 mg, 45%; yellow oil; <sup>1</sup>H NMR (400 MHz, DMSO-*d*<sub>6</sub>): δ 7.33 – 7.22 (m, 5H), 5.36 (d, *J* = 0.8 Hz, 1H), 3.99 (t, *J* = 2.0 Hz, 1H), 3.08 – 3.03 (m, 1H), 2.87 – 2.79 (m, 1H), 2.64 – 2.56 (m, 2H), 2.14 (s, 3H), 2.12 (s, 3H) ppm; <sup>13</sup>C{<sup>1</sup>H} NMR (100 MHz, DMSO-*d*<sub>6</sub>): δ 149.7, 145.9, 142.5, 128.0 (2C), 127.9 (2C), 127.0, 120.4, 105.0,

65.2, 51.4, 42.5, 23.3, 13.1 ppm; HRMS (ESI<sup>+</sup>) m/z: [M+H]<sup>+</sup> Calcd for C<sub>15</sub>H<sub>18</sub>NO<sup>+</sup> 228.1383; found 228.1387.

**6. Synthesis of 1-(2-methyl-4-phenyl-6,7-dihydrofuro[3,2-c]pyridin-5(4*H*)-yl)ethan-1-one (4q).** In a manner similar as described earlier [3]. To a solution of 2-methyl-4-phenyl-4,5,6,7-tetrahydrofuro[3,2-c]pyridine (**4a**, 0.8 mmol, 176 mg), TEA (2.5 mmol, 347  $\mu$ L) in dry acetonitrile (2 mL) and acetyl chloride (2.5 mmol, 178  $\mu$ L) were added dropwise. The reaction mixture was refluxed for 1 h (TLC control). Then the reaction mixture was poured into aq. NaOH (0.1 M, 50 mL) and the product was extracted with ethyl acetate (3  $\times$  10 mL). The combined organic layers were washed with brine (3  $\times$  10 mL), dried with anhydrous Na<sub>2</sub>SO<sub>4</sub> and concentrated to dryness under reduced pressure. The product was purified by column chromatography on silica gel using a mixture of petroleum ether/ethyl acetate 5:1 as an eluent. Yield: 160 mg, 75%; yellow oil; <sup>1</sup>H NMR (400 MHz, DMSO-*d*<sub>6</sub>):  $\delta$  7.32 – 7.26 (m, 5H), 6.50 (s, 1H), 5.99 (s, 1H), 3.95 – 3.90 (m, 1H), 3.19 – 3.12 (m, 1H), 2.87 – 2.80 (m, 1H), 2.63 – 2.60 (m, 1H), 2.25 (s, 3H), 2.12 (s, 3H) ppm; <sup>13</sup>C{<sup>1</sup>H} NMR (100 MHz, DMSO-*d*<sub>6</sub>):  $\delta$  169.1, 151.1, 147.7, 141.2, 128.7 (2C), 128.0 (2C), 127.8, 117.8, 106.0, 50.8, 40.1, 24.3, 22.0, 13.7 ppm; HRMS (ESI<sup>+</sup>) m/z: [M+H]<sup>+</sup> Calcd for C<sub>16</sub>H<sub>18</sub>NO<sub>2</sub><sup>+</sup> 256.1332; found 256.1340.

## 7. Copies of $^1\text{H}$ , $^{13}\text{C}$ NMR spectra of new compounds

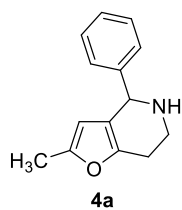

$^1\text{H}$ , DMSO, 400 MHz

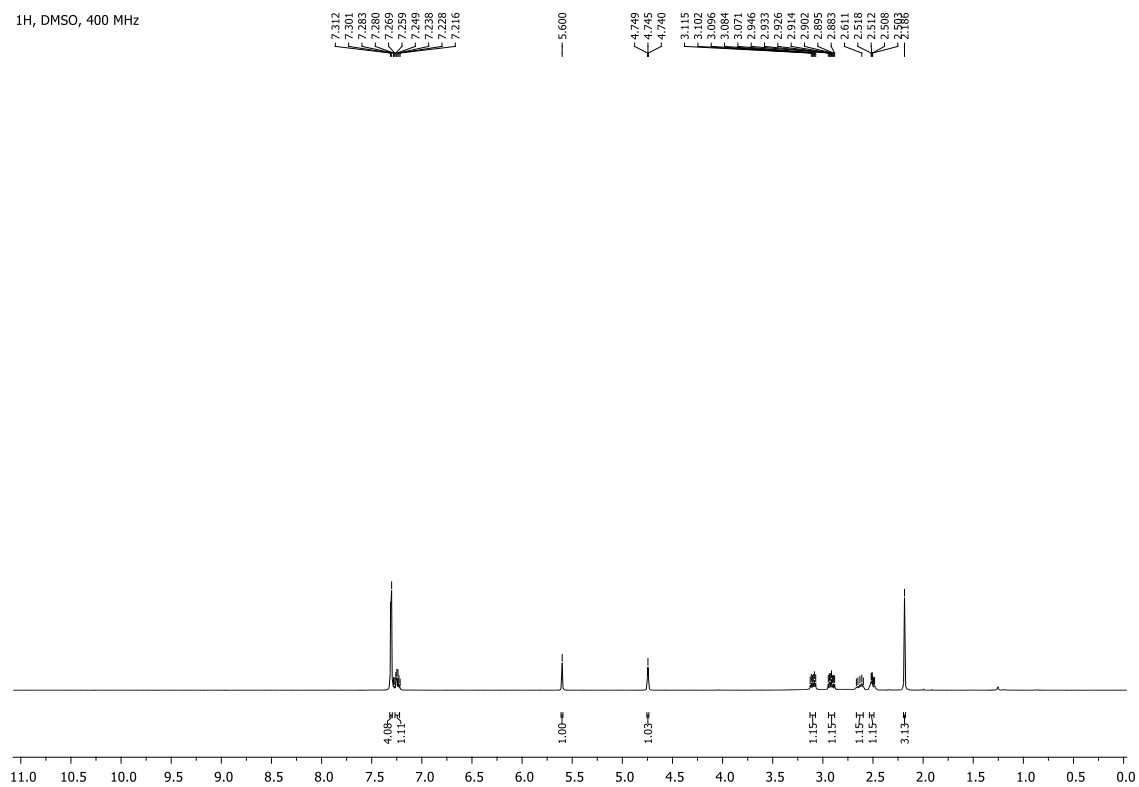

$^{13}\text{C}$ , DMSO, 100 MHz

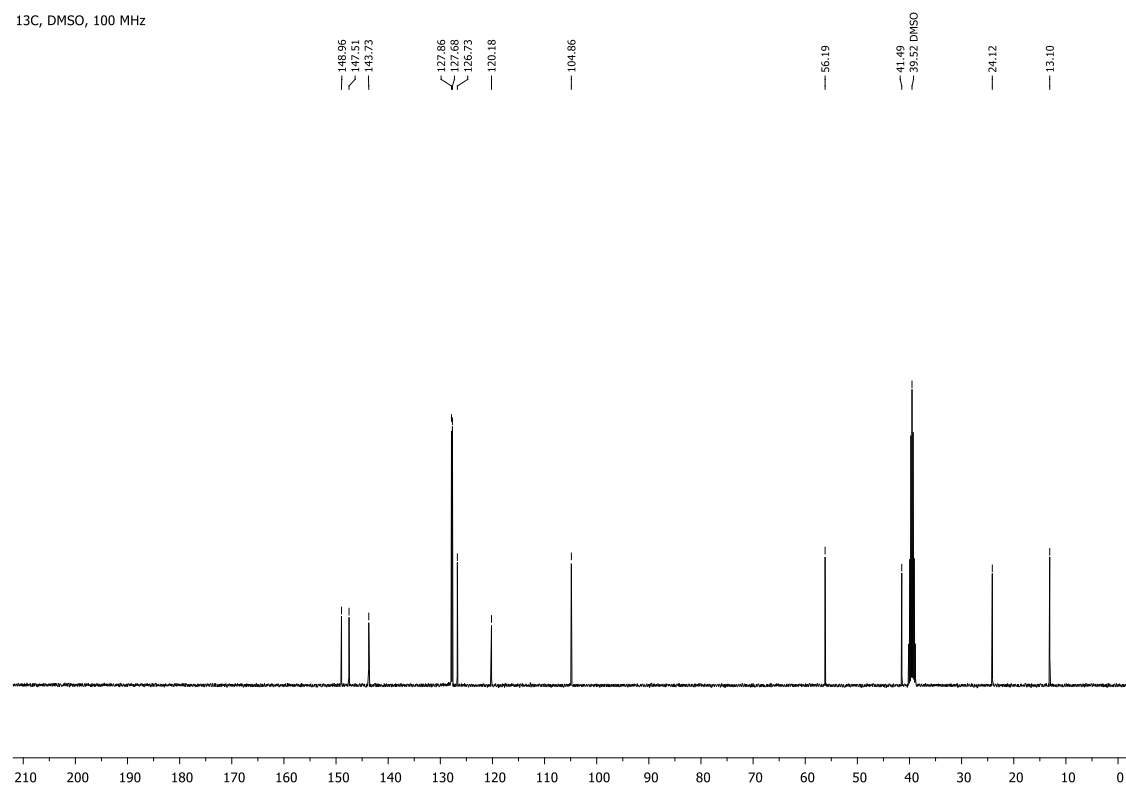

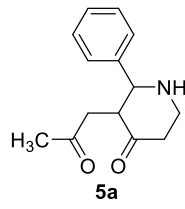

<sup>1</sup>H, DMSO, 400 MHz

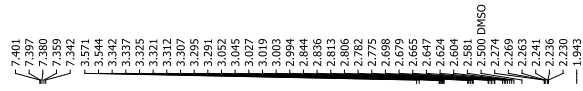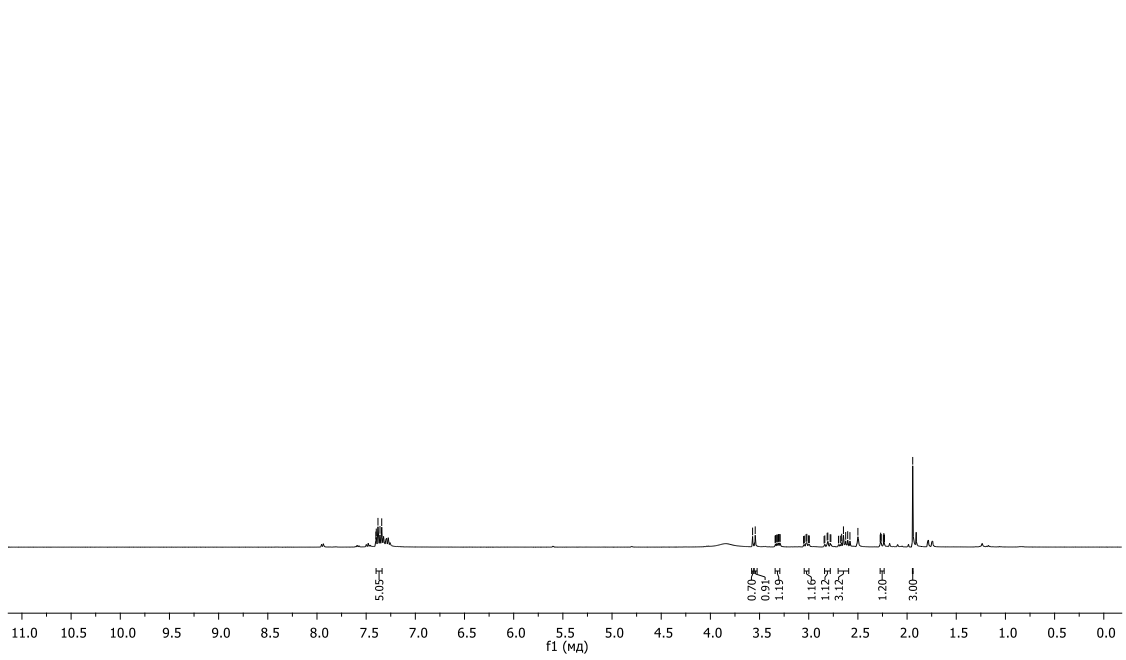

<sup>13</sup>C, DMSO, 100 MHz

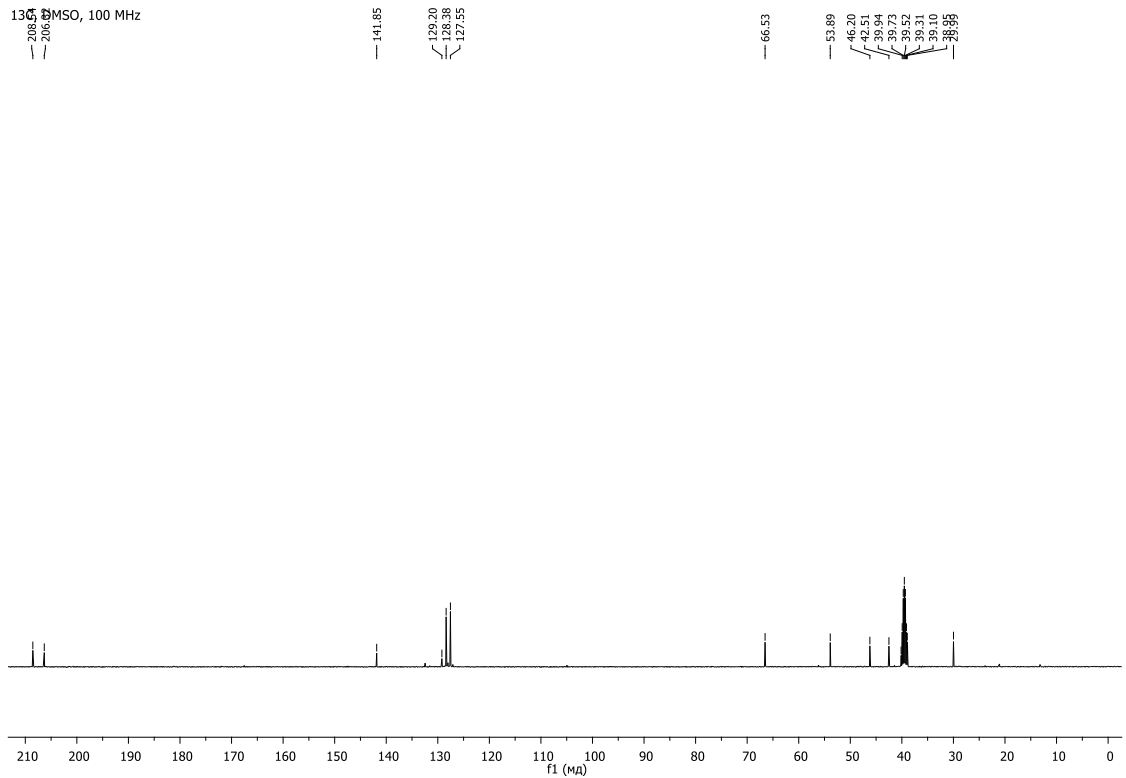

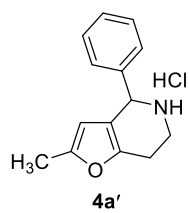

<sup>1</sup>H, DMSO, 400 MHz

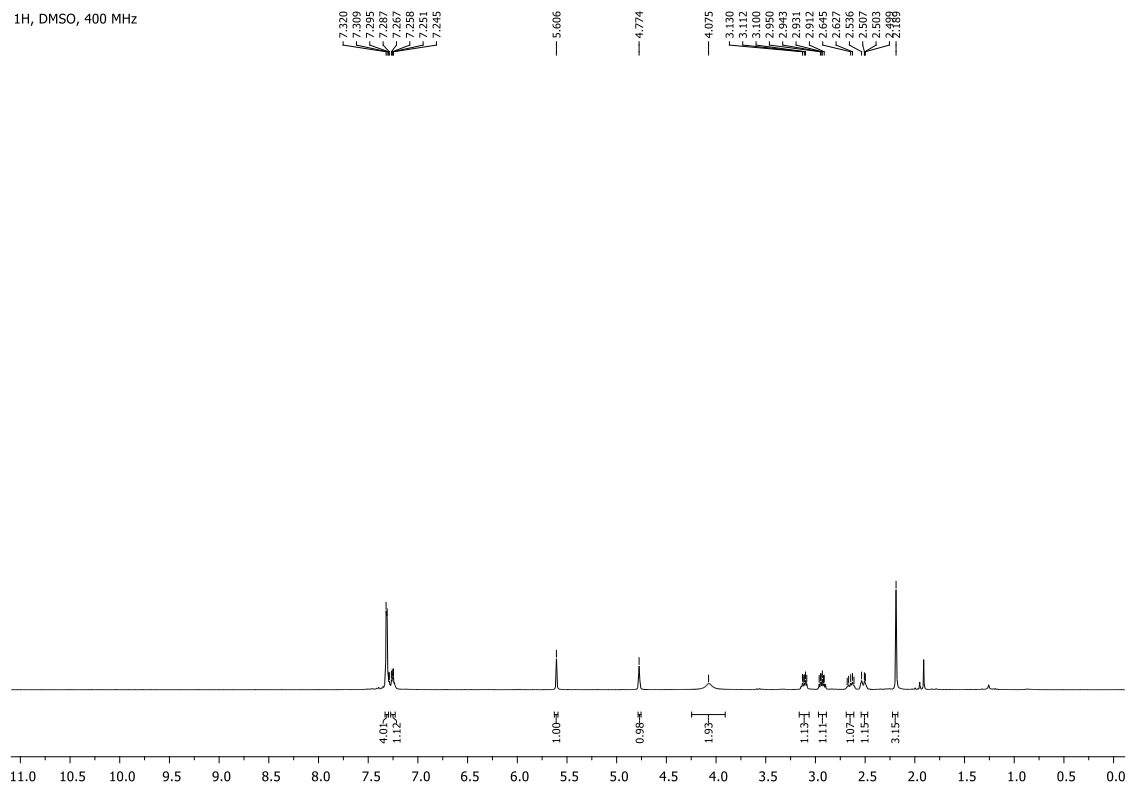

<sup>13</sup>C, DMSO, 100 MHz

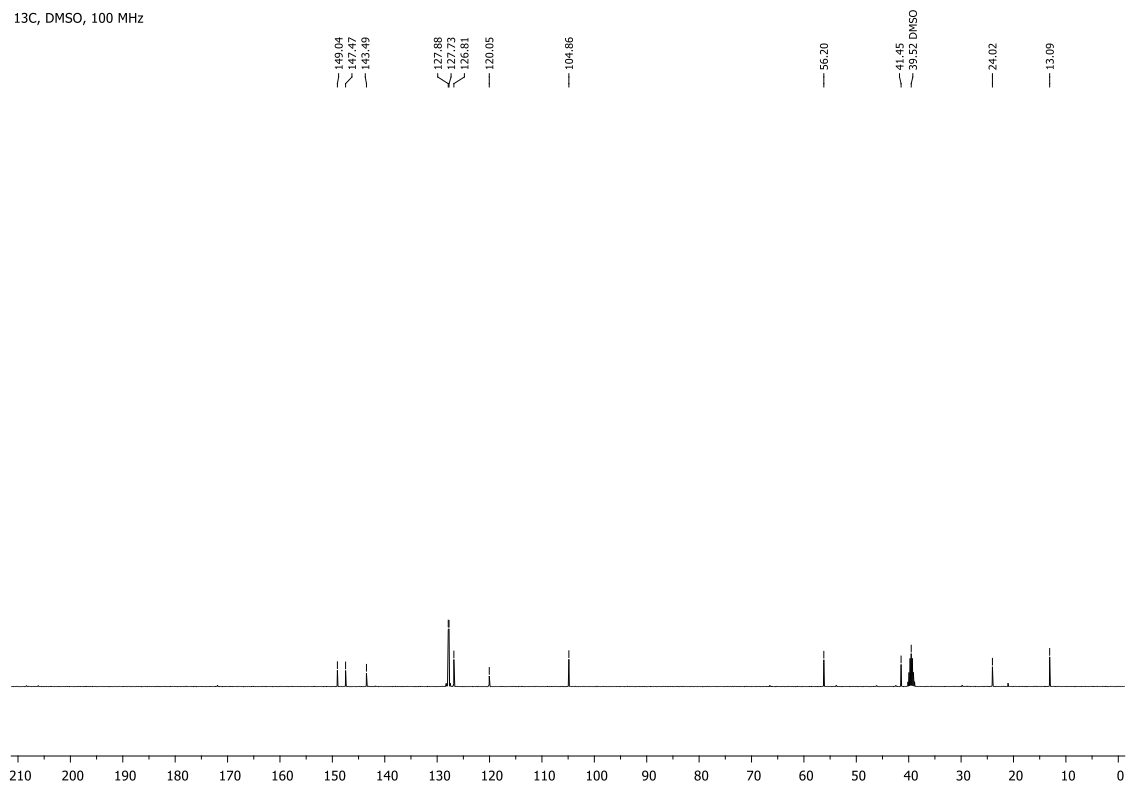

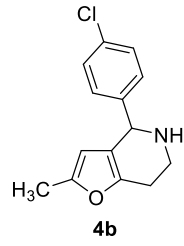

<sup>1</sup>H, DMSO, 400 MHz

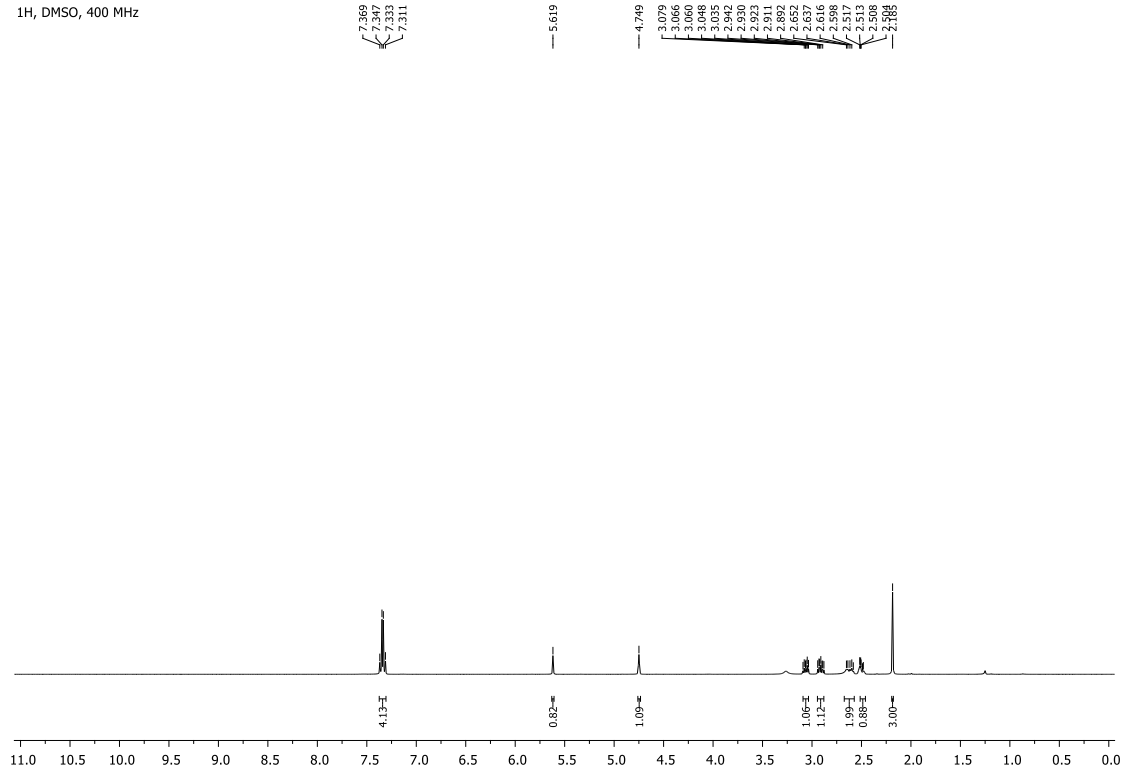

<sup>13</sup>C, DMSO, 100 MHz

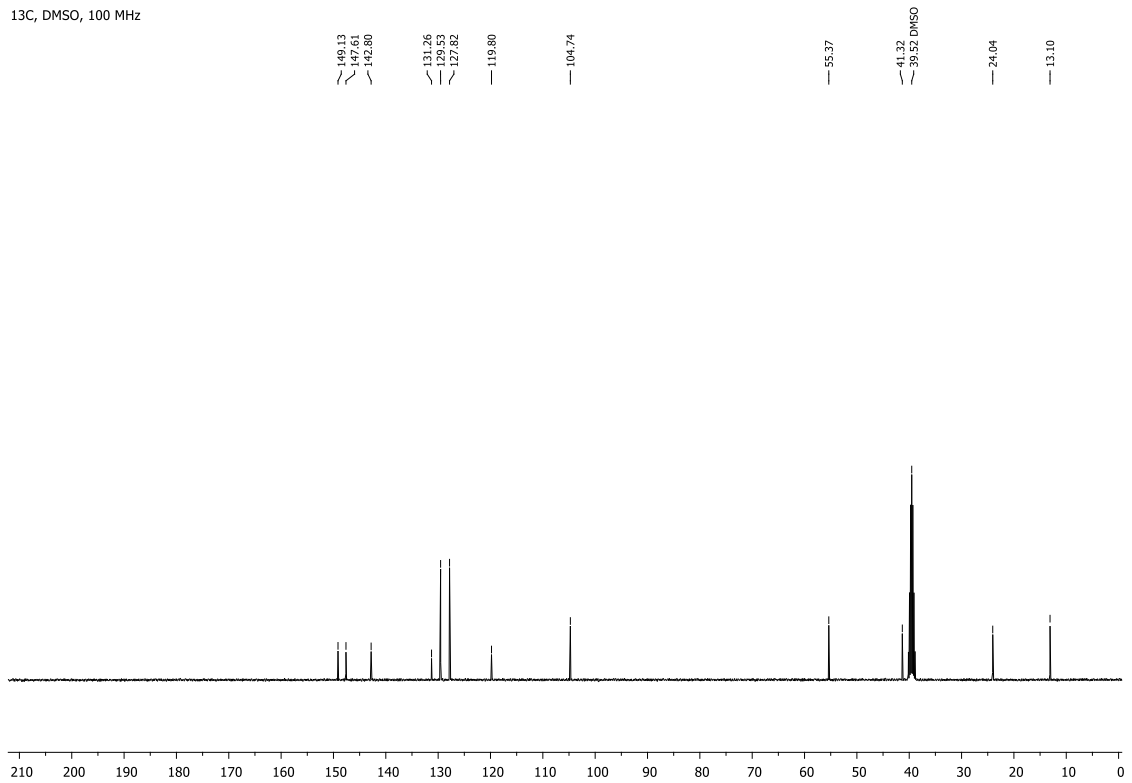

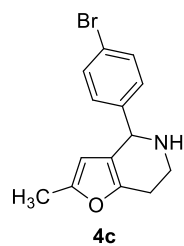

<sup>1</sup>H, DMSO, 400 MHz

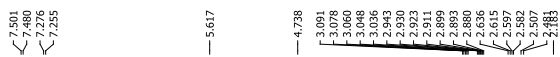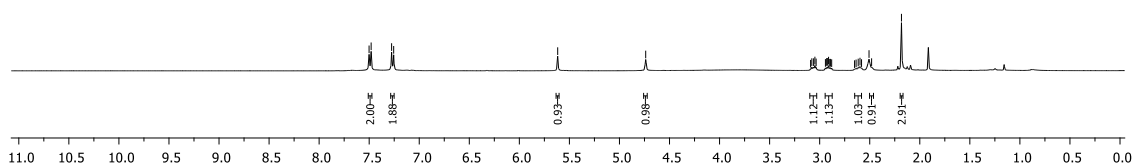

<sup>13</sup>C, DMSO, 100 MHz

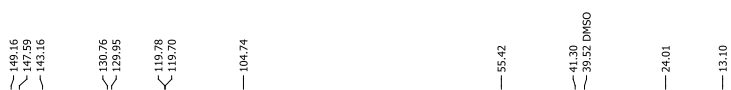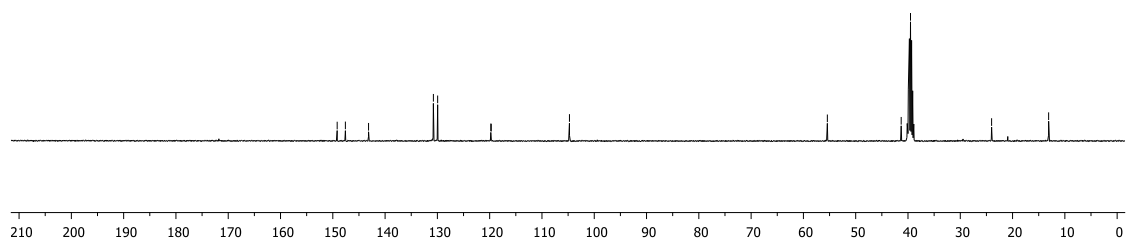



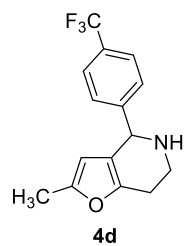

<sup>1</sup>H, DMSO, 400 MHz

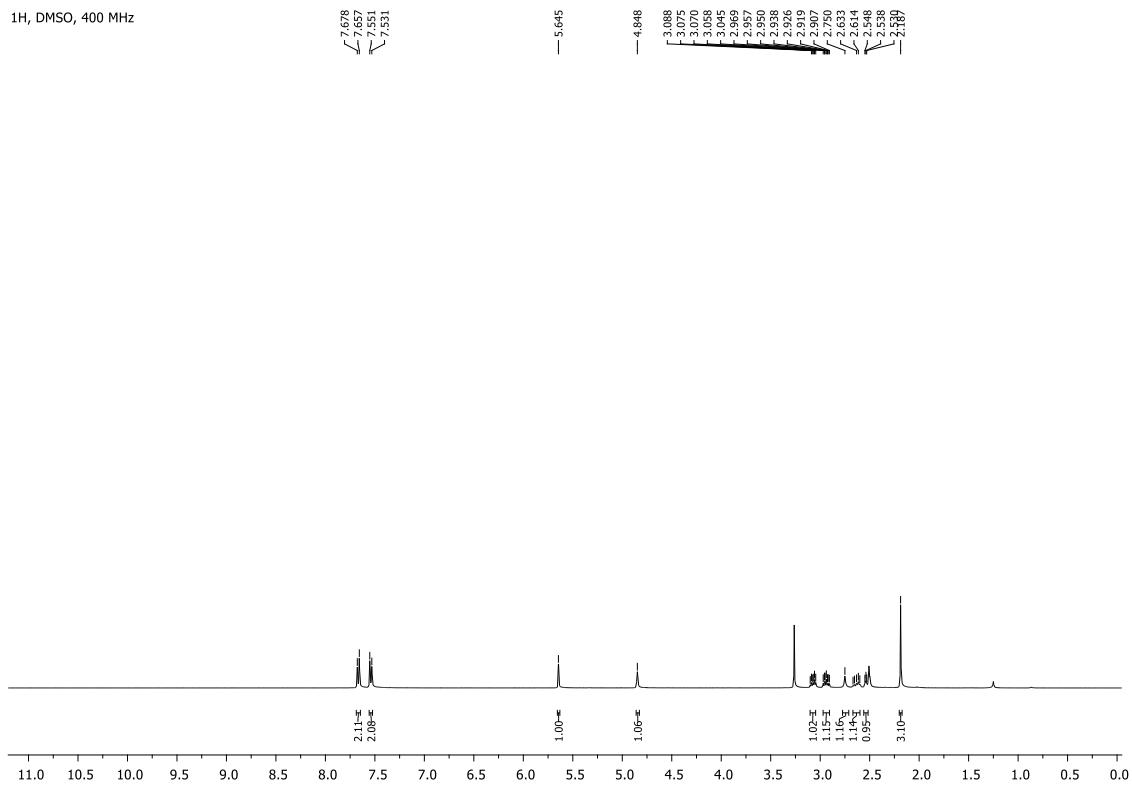

<sup>13</sup>C, DMSO, 100 MHz

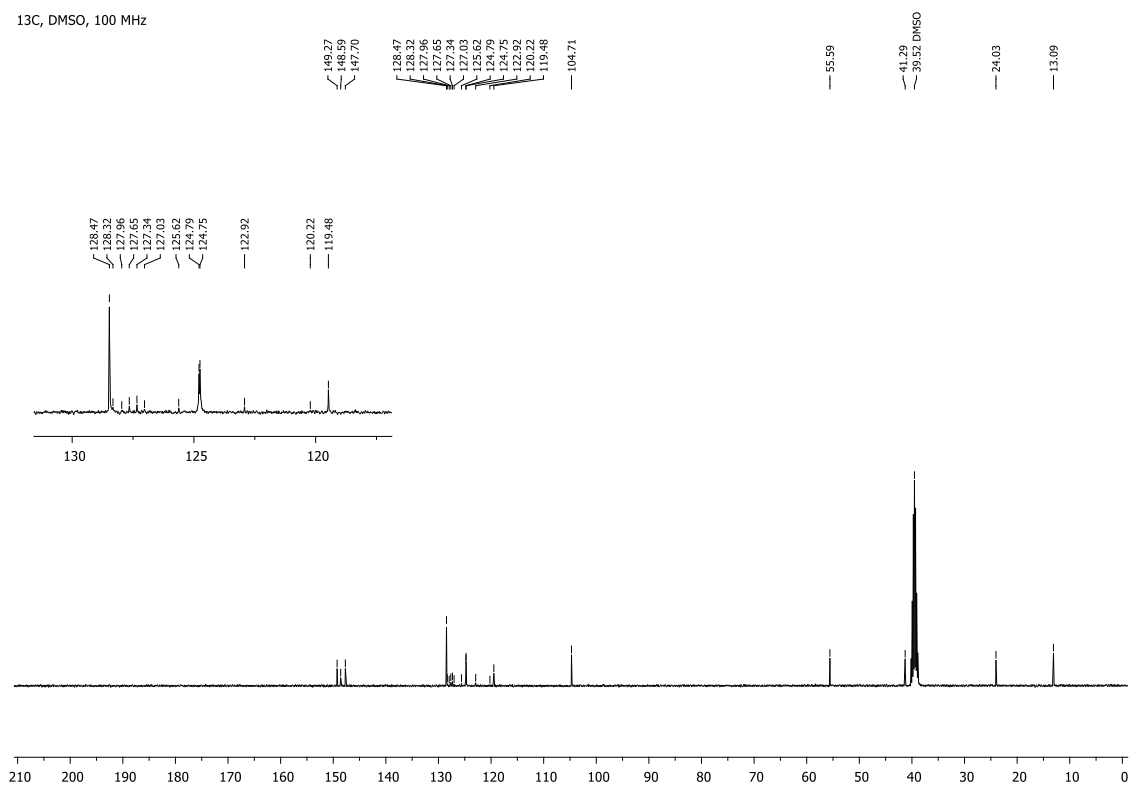

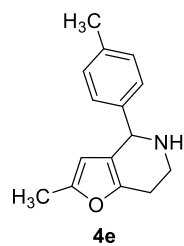

<sup>1</sup>H, DMSO, 400 MHz

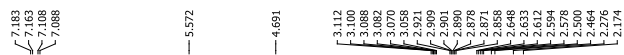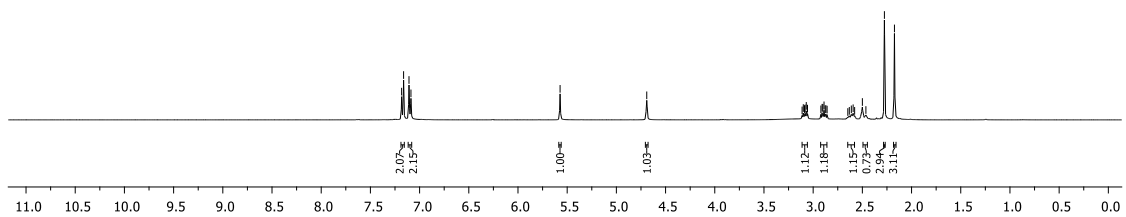

<sup>13</sup>C, DMSO, 100 MHz

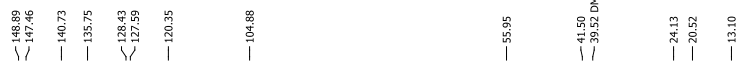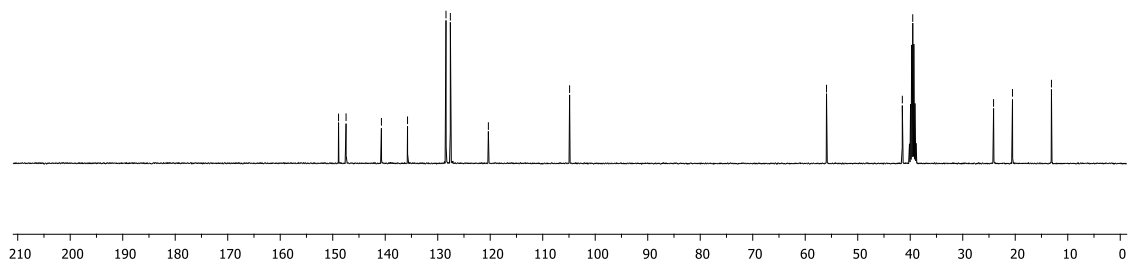

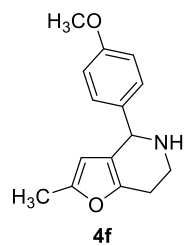

<sup>1</sup>H, DMSO, 400 MHz

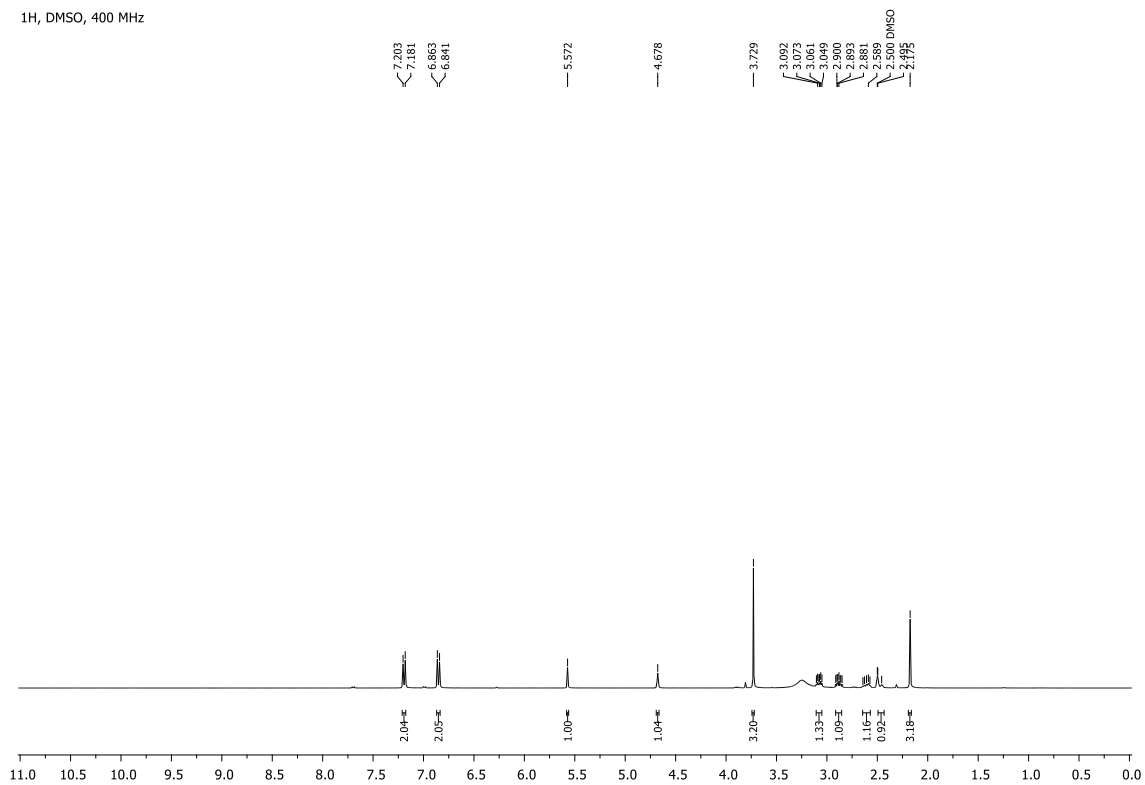

<sup>13</sup>C, DMSO, 100 MHz

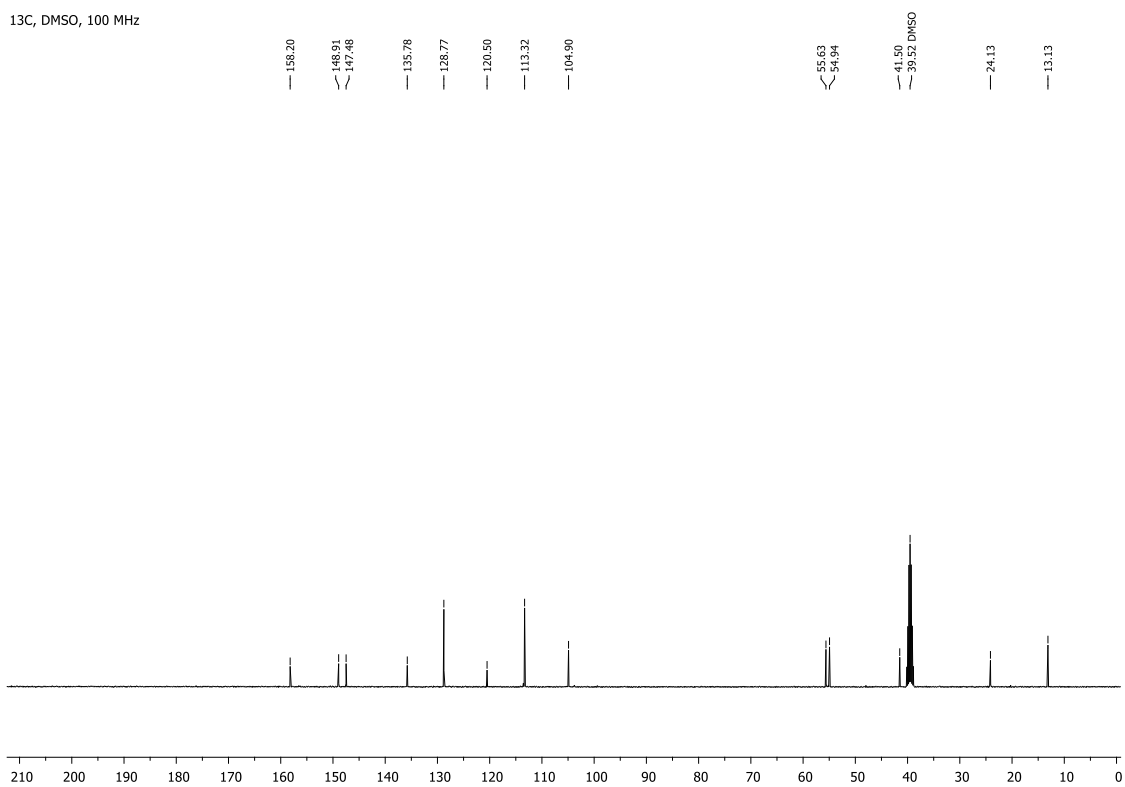

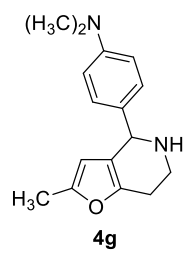

<sup>1</sup>H, DMSO, 400 MHz

7.688  
 7.666  
 6.665  
 6.643  
 5.564  
 4.622  
 3.111  
 3.089  
 3.087  
 3.081  
 3.070  
 3.057  
 2.901  
 2.886  
 2.880  
 2.868  
 2.856  
 2.590 DMSO  
 2.583  
 2.463  
 2.451  
 2.448  
 2.175

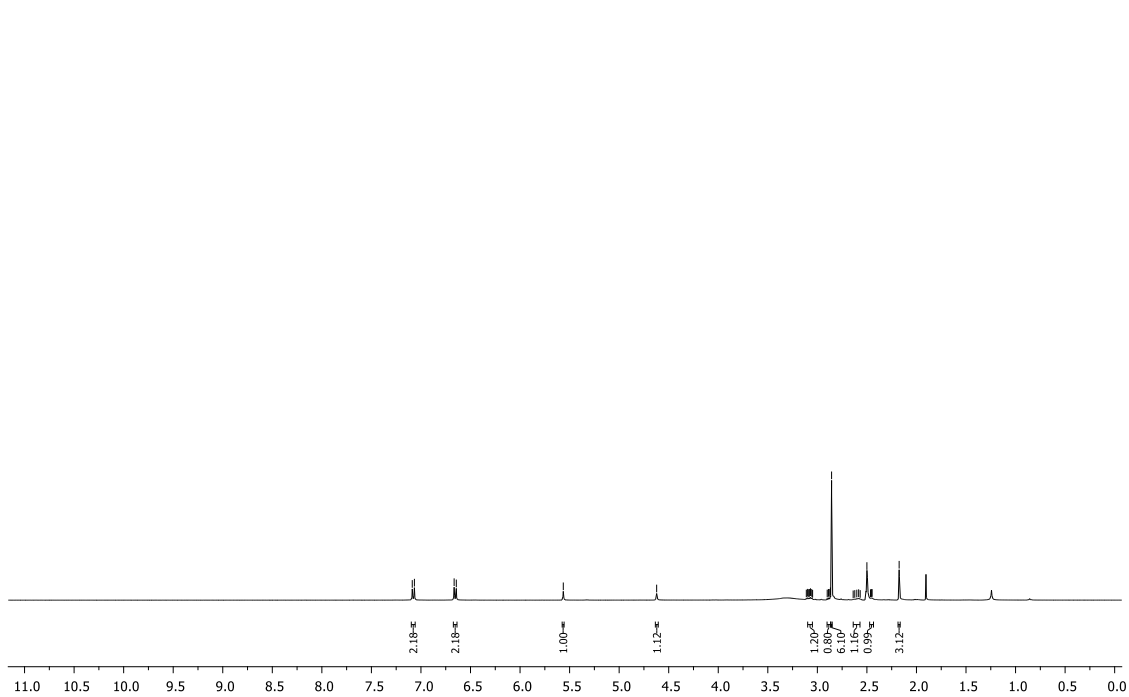

<sup>13</sup>C, DMSO, 100 MHz

150.15  
 149.33  
 147.96  
 131.87  
 128.89  
 121.31  
 112.63  
 105.57  
 56.30  
 42.09  
 40.77  
 24.72  
 13.71

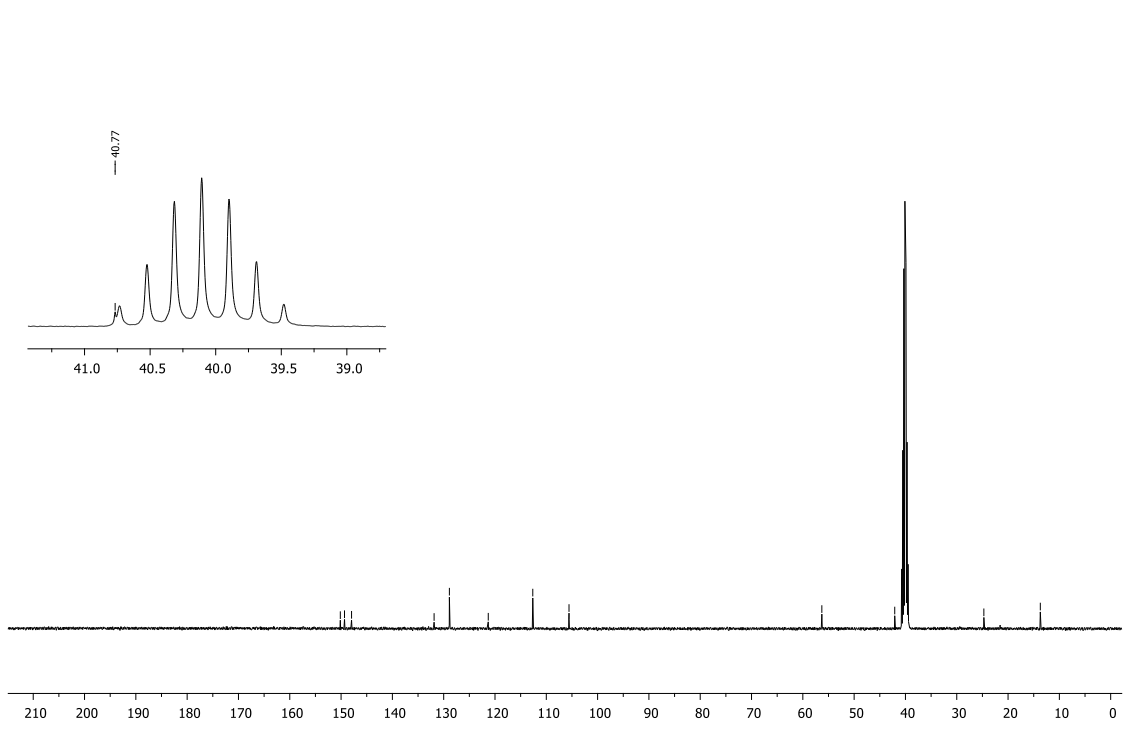

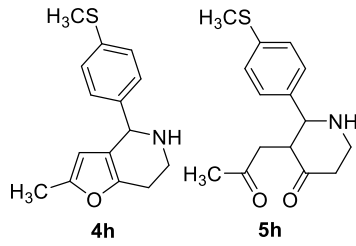

<sup>1</sup>H, DMSO, 400 MHz

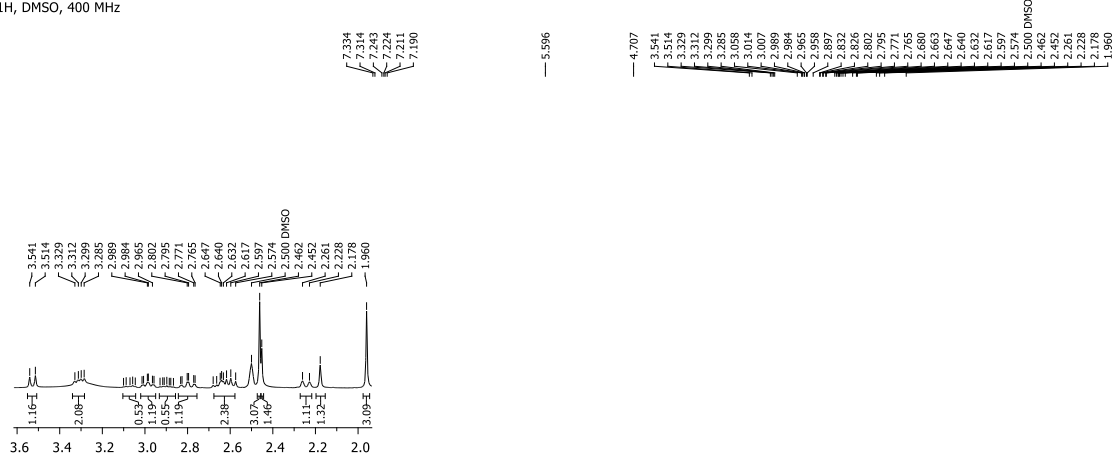

<sup>13</sup>C, DMSO, 100 MHz

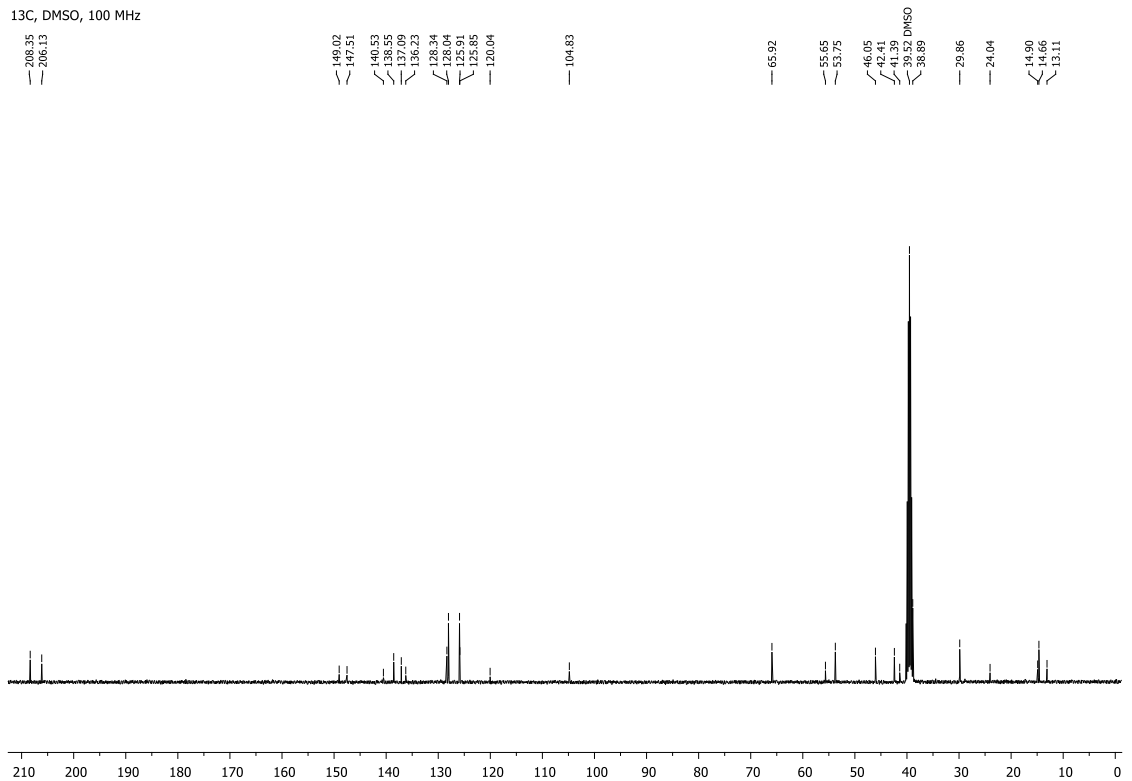

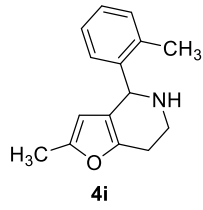

<sup>1</sup>H, DMSO, 400 MHz

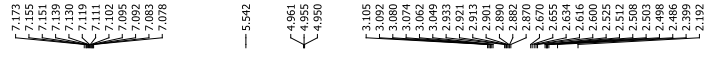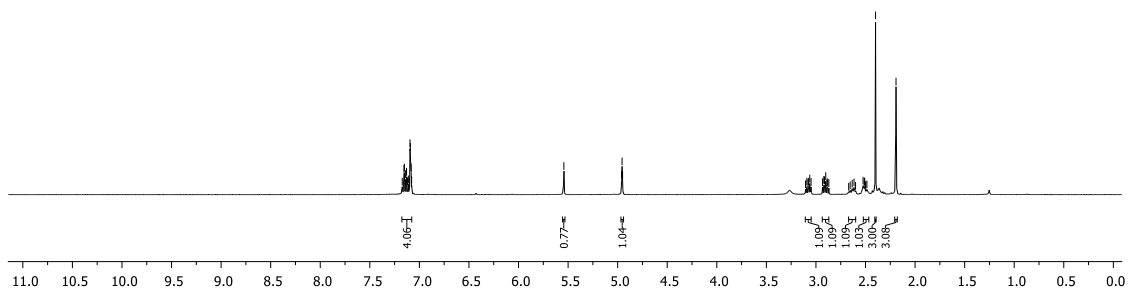

<sup>13</sup>C, DMSO, 100 MHz

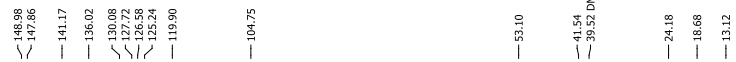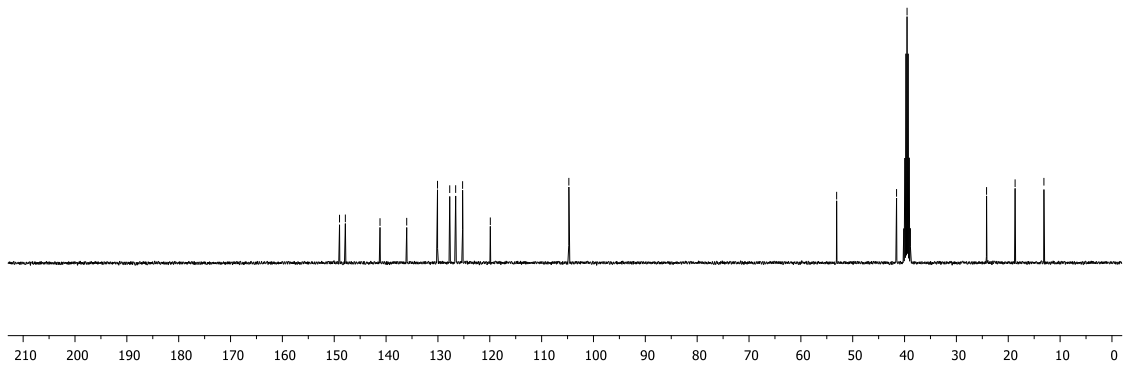

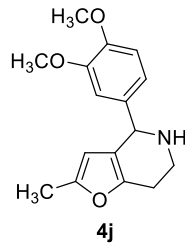

<sup>1</sup>H, DMSO, 400 MHz

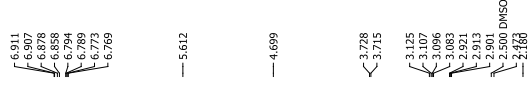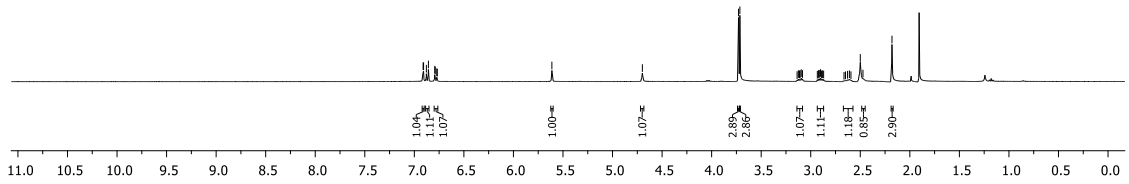

<sup>13</sup>C, DMSO, 100 MHz

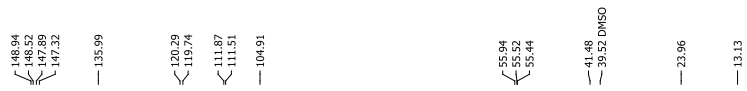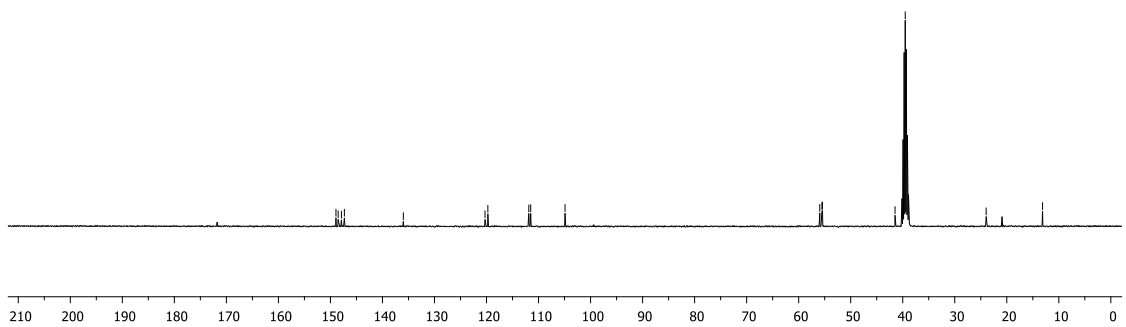

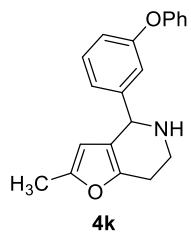

<sup>1</sup>H, DMSO, 400 MHz

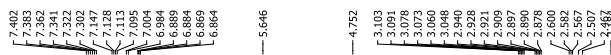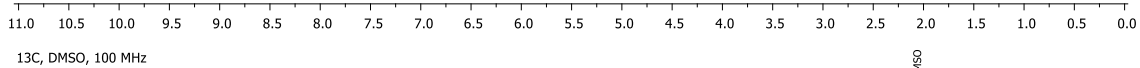

<sup>13</sup>C, DMSO, 100 MHz

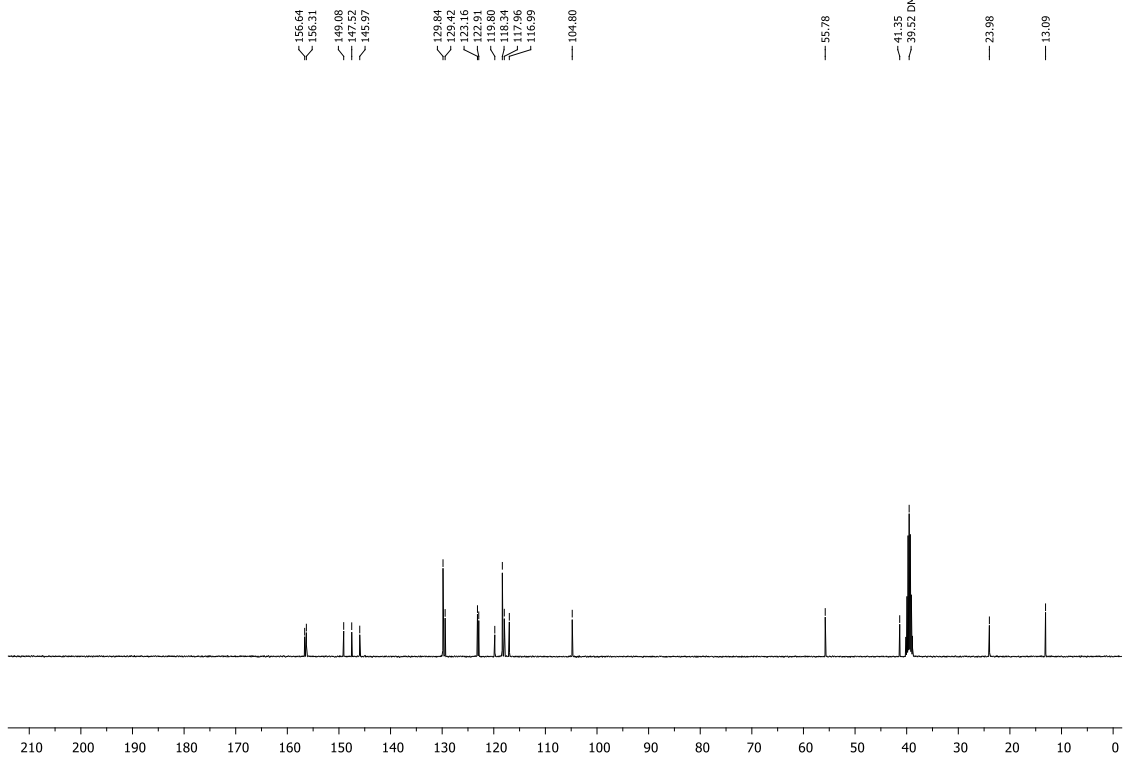



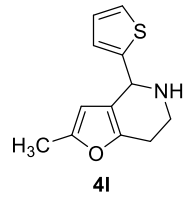

<sup>1</sup>H, DMSO, 400 MHz

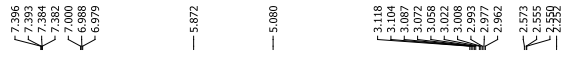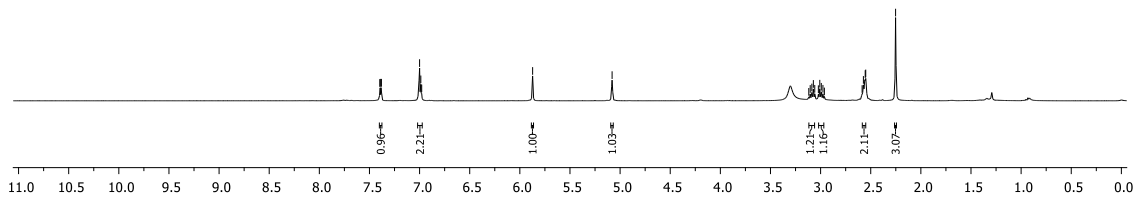

<sup>13</sup>C, DMSO, 100 MHz

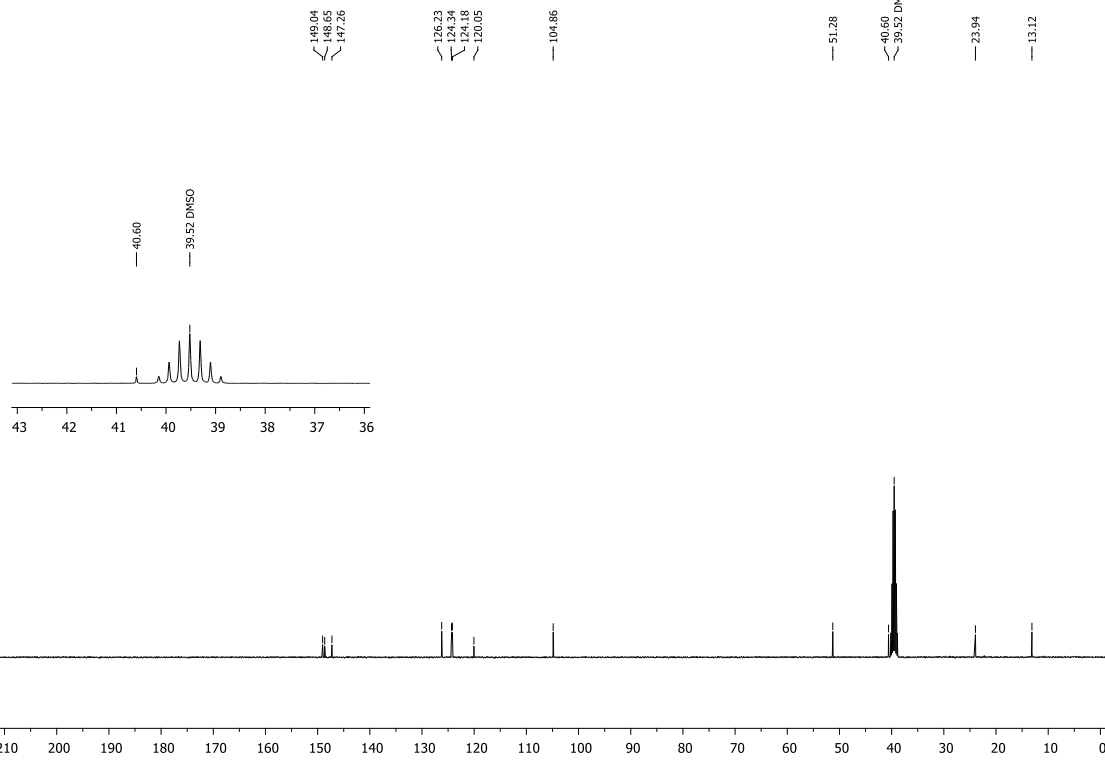

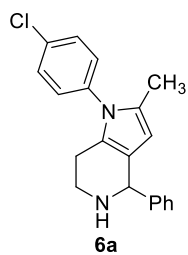

<sup>1</sup>H, DMSO, 400 MHz

7.554  
7.535  
7.384  
7.366  
7.335  
7.318  
7.287  
7.242  
7.225

5.436

4.827

3.093  
3.077  
3.064  
2.946  
2.913  
2.890  
2.500 DMSO  
2.225  
2.179  
1.984

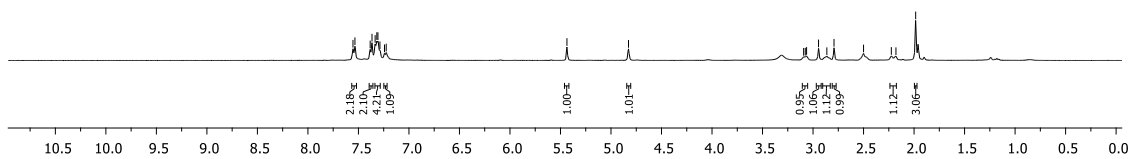

<sup>13</sup>C, DMSO, 100 MHz

144.96  
136.65  
129.07  
128.91  
127.81  
127.71  
126.63  
126.48  
118.98  
118.95

105.24

57.32

42.10  
39.52 DMSO

23.60

12.31

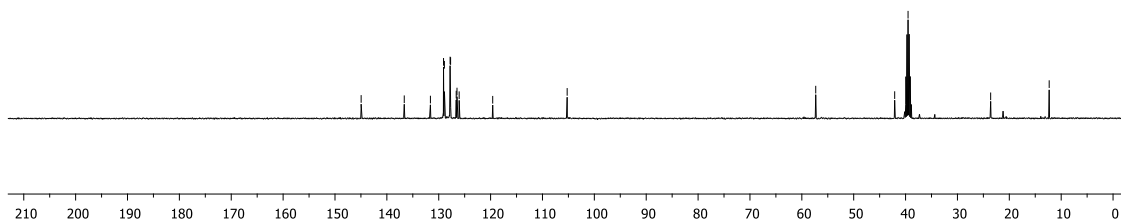

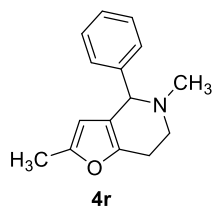

<sup>1</sup>H, DMSO, 400 MHz

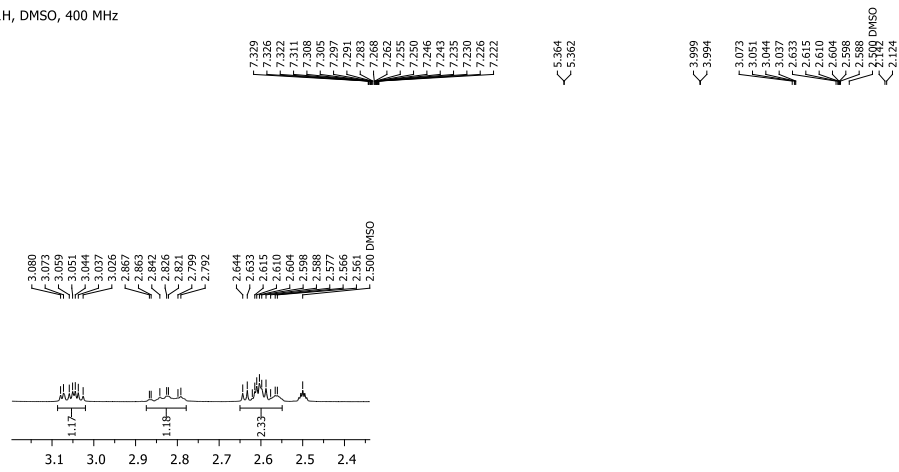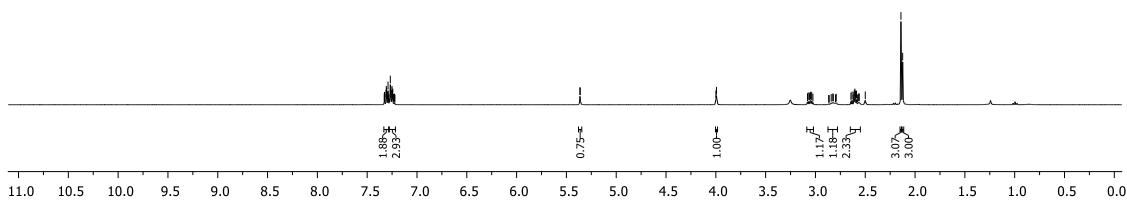

<sup>13</sup>C, DMSO, 100 MHz

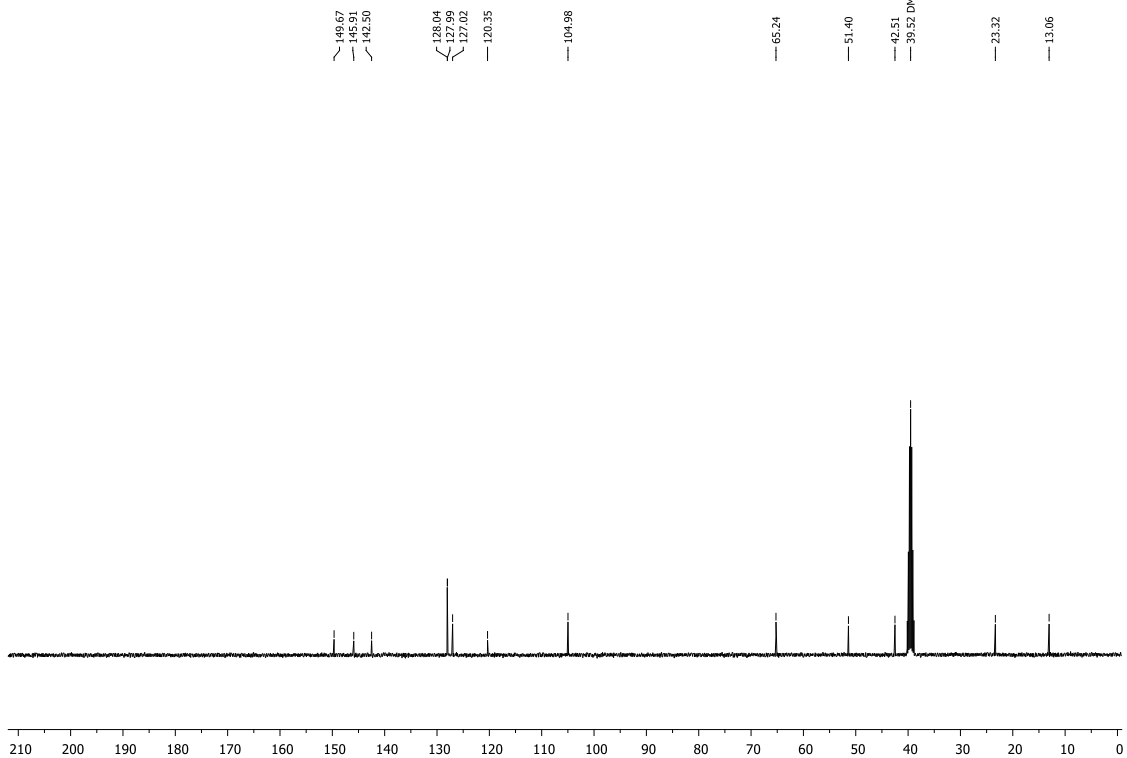

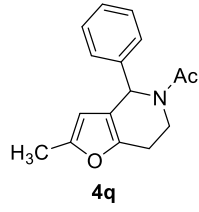

<sup>1</sup>H, DMSO, 400 MHz

7.319  
7.304  
7.278  
7.260

6.496

5.992

3.949  
3.936  
3.914  
3.901  
3.190  
3.181  
3.152  
3.146  
3.116  
2.871  
2.843  
2.816  
2.804  
2.609  
2.590  
2.500 DMSO  
2.248  
2.119

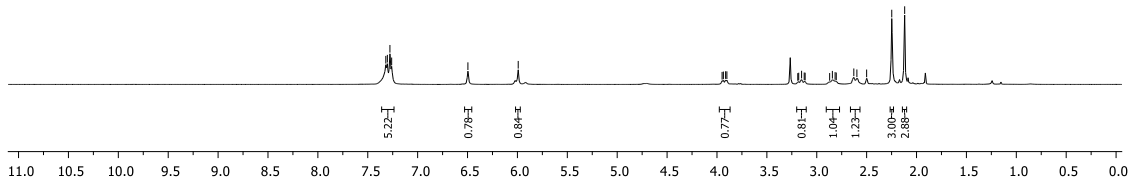

<sup>13</sup>C, DMSO, 100 MHz

168.12  
151.06  
147.65  
141.22  
128.73  
128.02  
127.77  
117.77  
106.02  
50.77  
40.05  
24.26  
22.02  
13.73

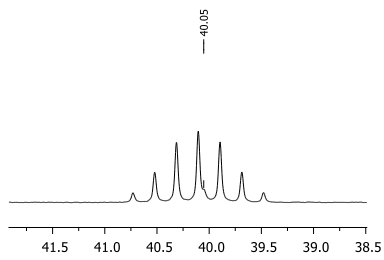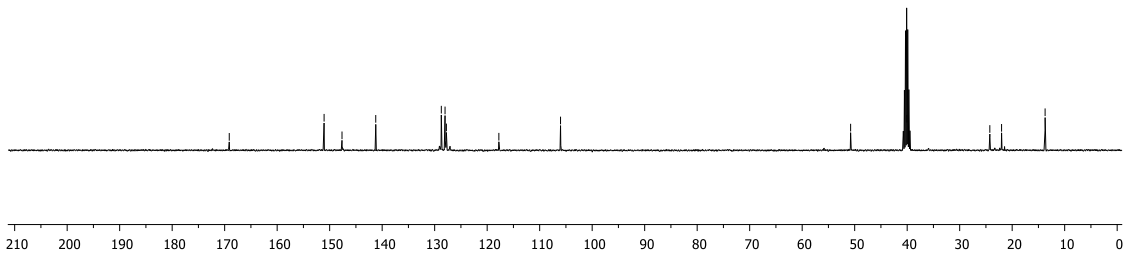

## 8. X-ray crystallography data

**Table S1:** Experimental details for 2-methyl-4-phenyl-4,5,6,7-tetrahydrofuro[3,2-c]pyridine (**4a**, CCDC 2253942).

|                                                                                                                |                                                                                                                                                                                                                                                                                |
|----------------------------------------------------------------------------------------------------------------|--------------------------------------------------------------------------------------------------------------------------------------------------------------------------------------------------------------------------------------------------------------------------------|
| Crystal data                                                                                                   |                                                                                                                                                                                                                                                                                |
| Chemical formula                                                                                               | C <sub>14</sub> H <sub>15</sub> NO                                                                                                                                                                                                                                             |
| <i>M<sub>r</sub></i>                                                                                           | 213.27                                                                                                                                                                                                                                                                         |
| Crystal system, space group                                                                                    | Monoclinic, <i>P</i> 2 <sub>1</sub> / <i>c</i>                                                                                                                                                                                                                                 |
| Temperature (K)                                                                                                | 295                                                                                                                                                                                                                                                                            |
| <i>a</i> , <i>b</i> , <i>c</i> (Å)                                                                             | 12.073 (3), 5.7407 (16), 16.957 (4)                                                                                                                                                                                                                                            |
| β (°)                                                                                                          | 93.28 (2)                                                                                                                                                                                                                                                                      |
| <i>V</i> (Å <sup>3</sup> )                                                                                     | 1173.3 (5)                                                                                                                                                                                                                                                                     |
| <i>Z</i>                                                                                                       | 4                                                                                                                                                                                                                                                                              |
| Radiation type                                                                                                 | Mo <i>K</i> α                                                                                                                                                                                                                                                                  |
| μ (mm <sup>-1</sup> )                                                                                          | 0.08                                                                                                                                                                                                                                                                           |
| Crystal size (mm)                                                                                              | 0.6 × 0.4 × 0.12                                                                                                                                                                                                                                                               |
| Data collection                                                                                                |                                                                                                                                                                                                                                                                                |
| Diffractometer                                                                                                 | New Xcalibur, Ruby                                                                                                                                                                                                                                                             |
| Absorption correction                                                                                          | Multi-scan<br><i>CrysAlis PRO</i> , Agilent Technologies, Version 1.171.37.33 (release 27-03-2014 <i>CrysAlis171 .NET</i> ) (compiled Mar 27 2014,17:12:48) Empirical absorption correction using spherical harmonics, implemented in <i>SCALE3 ABSPACK</i> scaling algorithm. |
| <i>T<sub>min</sub></i> , <i>T<sub>max</sub></i>                                                                | 0.517, 1.000                                                                                                                                                                                                                                                                   |
| No. of measured, independent and observed [ <i>I</i> > 2σ( <i>I</i> )] reflections                             | 5659, 2777, 1712                                                                                                                                                                                                                                                               |
| <i>R<sub>int</sub></i>                                                                                         | 0.043                                                                                                                                                                                                                                                                          |
| (sin θ/λ) <sub>max</sub> (Å <sup>-1</sup> )                                                                    | 0.693                                                                                                                                                                                                                                                                          |
| Refinement                                                                                                     |                                                                                                                                                                                                                                                                                |
| <i>R</i> [ <i>F</i> <sup>2</sup> > 2σ( <i>F</i> <sup>2</sup> )], <i>wR</i> ( <i>F</i> <sup>2</sup> ), <i>S</i> | 0.059, 0.179, 1.03                                                                                                                                                                                                                                                             |
| No. of reflections                                                                                             | 2777                                                                                                                                                                                                                                                                           |
| No. of parameters                                                                                              | 150                                                                                                                                                                                                                                                                            |
| H-atom treatment                                                                                               | H atoms treated by a mixture of independent and constrained refinement                                                                                                                                                                                                         |
| Δρ <sub>max</sub> , Δρ <sub>min</sub> (e Å <sup>-3</sup> )                                                     | 0.18, -0.28                                                                                                                                                                                                                                                                    |

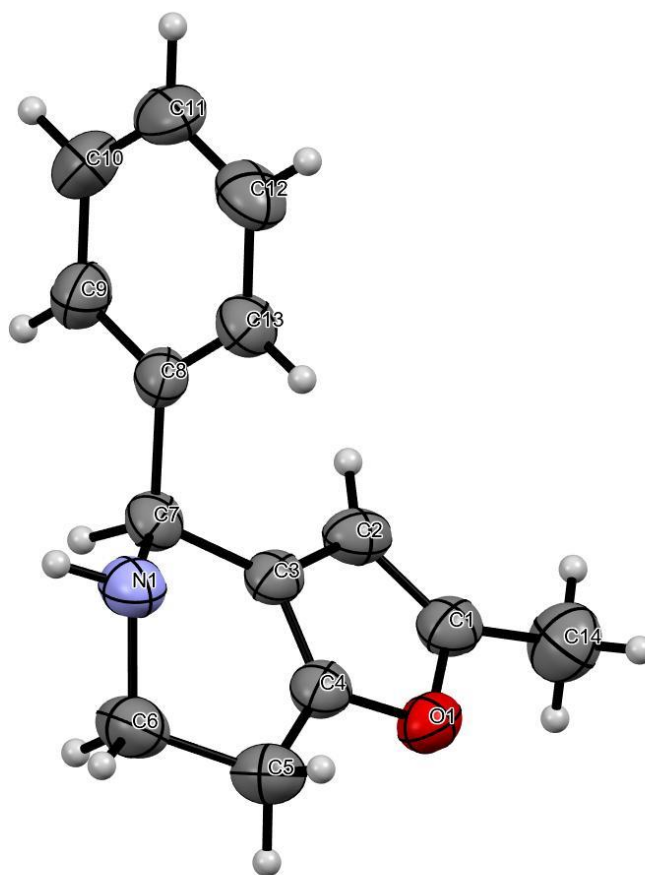

**Figure S1:** Structure of 2-methyl-4-phenyl-4,5,6,7-tetrahydrofuro[3,2-*c*]pyridine (**4a**, CCDC 2253942) according to the X-ray diffraction data; non-hydrogen atoms are shown as thermal vibration ellipsoids with a probability of 50%.

## 9. References

1. Demircan, A.; Parsons, P. J. *Heterocycl. Commun.* **2002**, *8*, 531-536. doi: 10.1515/HC.2002.8.6.531
2. Schneider, C. 4-Phenyl-tetrahydro-furano-pyridines and anti-depressant pharmaceutical composition containing same. U.S. Patent 4,636,510, Jan. 13, 1987.
3. Zelina, E. Y.; Nevolina, T. A.; Skvortsov, D. A.; Trushkov, I. V.; Uchuskin, M. G. *J. Org. Chem.* **2019**, *84*, 13707-13720. doi: 10.1021/acs.joc.9b01925
